# Supplementary material for: Synthesis and reactivity of PC(sp3)P-pincer iridium complexes bearing a diborylmethyl anion
Source: Royal Society of Chemistry journal article supplement (doi:10.1039/d2dt00513a), 2022-01-01
Supplement: d2dt00513a2.pdf [file d2dt00513a2.pdf]

# **Synthesis and reactivity of PC(sp<sup>3</sup>)P-pincer iridium complexes bearing diborylmethyl anion**

Masamichi Kishino, Satoko Takaoka, Yuki Shibutani, Shuhei Kusumoto,\* and Kyoko Nozaki\*

*Department of Chemistry and Biotechnology, Graduate School of Engineering,  
The University of Tokyo, 7-3-1 Hongo, Bunkyo-ku, Tokyo 113-8656, Japan.*

| <b>Contents:</b>                                                                                     | <b>page</b> |
|------------------------------------------------------------------------------------------------------|-------------|
| <b>I. Experimental Section</b>                                                                       |             |
| I-I. General                                                                                         | <b>S2</b>   |
| I-II. Preparation & NMR Data of the Novel Compounds                                                  | <b>S3</b>   |
| I-III. Dehydrogenation of Cyclooctane                                                                | <b>S27</b>  |
| <b>II. IR Spectra of the Novel Compounds</b>                                                         | <b>S28</b>  |
| <b>III. Detail for the X-ray Crystallographic Analyses</b>                                           | <b>S32</b>  |
| <b>IV. Methods and Discussions for Theoretical Calculations</b>                                      |             |
| IV-I. NBO and MO Analysis of Complex <b>7<sub>Me</sub></b>                                           | <b>S36</b>  |
| IV-II. Calculated Molecular Orbitals of<br>Complexes <b>8<sub>Me</sub></b> and <b>C<sub>Me</sub></b> | <b>S38</b>  |
| IV-III. Deuterium Incorporation at the $\alpha$ -Position                                            | <b>S39</b>  |
| <b>V. References</b>                                                                                 | <b>S41</b>  |

# I. Experimental Section

## I-I. General

**Manipulation:** All reactions were carried out using a standard glovebox or Schlenk techniques under nitrogen or argon gas purified by passing through Nikka Seiko dry column DC-L4 (NIKKA SEIKO Co., Ltd.).

**Instrumentation:** Nuclear magnetic resonance (NMR) spectra were recorded on BRUKER Ascend500 ( $^1\text{H}$ : 500 MHz,  $^{13}\text{C}$ : 126 MHz,  $^{11}\text{B}$ : 160 MHz,  $^{31}\text{P}$ : 202 MHz with digital resolution of 0.305, 0.908, 0.98, 2.49 Hz, respectively), or JEOL ECS400 ( $^1\text{H}$ : 400 MHz,  $^2\text{H}$ : 61 MHz with digital resolution of 0.11, 0.05 Hz, respectively) at ambient temperature unless otherwise noted. Chemical shifts are reported in ppm relative to the residual protiated solvent for  $^1\text{H}$  (benzene- $d_6$  ( $\text{C}_6\text{D}_6$ ) 7.16 ppm, tetrahydrofuran- $d_8$  (THF- $d_8$ ) 3.58 ppm), the deuterated solvent for  $^{13}\text{C}$  ( $\text{C}_6\text{D}_6$  128.06 ppm, THF- $d_8$  67.21 ppm) and  $^2\text{H}$  ( $\text{C}_6\text{D}_6$  7.16 ppm), external  $(\text{C}_2\text{H}_5)_2\text{O}\cdot\text{BF}_3$  standard for  $^{11}\text{B}$  nuclei, and external 85%  $\text{H}_3\text{PO}_4$  standard for  $^{31}\text{P}$  nuclei. Mass spectra (MS) were taken with an electron spray ionization time-of-flight (ESI-TOF) method on a JEOL JMS-T100LP AccuTOF LC-plus mass spectrometer. Infrared (IR) spectra were recorded on a Shimadzu FTIR-8400 or a JASCO FTIR-6600 equipped with an attenuated total reflection (ATR) system. X-ray crystallographic analyses were performed on a Rigaku Varimax dual with Saturn diffractometer or with hybrid photon counting detector. Elemental analyses were performed by Microanalytical Laboratory of Department of Chemistry, Graduate School of Science, the University of Tokyo.

**Materials:** Anhydrous diethyl ether, hexane, tetrahydrofuran (THF), and toluene were purchased from Kanto Chemical Co., Inc. (Kanto) and purified by the method of Pangborn *et al.*<sup>1</sup> The following solvents and reagents were purchased and used as received: *n*-pentane, dehydrated -super- (FUJIFILM Wako Pure Chemical Co., Ltd. (Wako)), benzene, dehydrated -super- (Wako), 2-propanol (Wako), hydrazobenzene (Tokyo Chemical Industry Co., Ltd. (TCI)), methyllithium solution in diethyl ether (Br free) (Kanto). Sodium hydride (60%, dispersion in paraffin liquid) was purchased from TCI and used after paraffin liquid was removed with hexane.  $\text{C}_6\text{D}_6$  (Aldrich) was dehydrated with preactivated molecular sieves 3A. THF- $d_8$  (Aldrich) was dehydrated with NaK. Carbon monoxide gas (Taiyo Nippon Sanso JFP Co.) was purified by passing through a dry column (DC-HDF300-A3, Nikka Seiko Co., Ltd.). The following reagents were prepared according to the literature procedures: methylenebis(boronic acid) (**2**),<sup>2</sup> di-*tert*-butylphosphinomethyllithium,<sup>3</sup> chlorobis(cyclooctene)iridium dimer,<sup>4</sup> bis(trimethylsilyl)methyllithium.<sup>5</sup>

## I-II. Preparation & NMR Data of the Novel Compounds

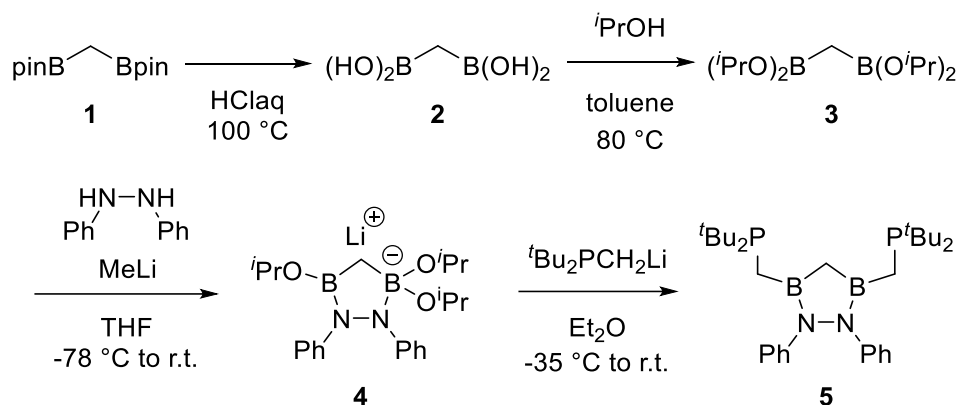

**Scheme S1.** The entire procedure for the synthesis of the ligand precursor **5**.

### B,B'-methylenebis-[B,B',B',-tetra-(2-propyl) ester boronic acid] (**3**)

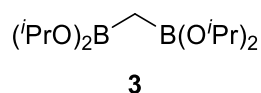

To a solution of methylenebis(boronic acid) (**2**) (7.35 g, 70.9 mmol) in toluene (150 mL), 2-propanol (45 mL, 585 mmol) and the preactivated molecular sieve 3A were added. The mixture was stirred at 80 °C for 5 days. After removal of the molecular sieve by filtration, the solvent was removed under reduced pressure. The desired compound **3** was obtained as colourless or pale-yellow oil (12.85 g, 67% yield).

$^1\text{H}$  NMR (500 MHz,  $\text{C}_6\text{D}_6$ )  $\delta$ : 4.61 (sept,  $J = 6.1$  Hz, 4H), 1.19 (d,  $J = 6.1$  Hz, 24H), 0.55 (s, 2H);  $^{13}\text{C}$  NMR (126 MHz,  $\text{C}_6\text{D}_6$ )  $\delta$ : 65.5 (s, 4C), 24.8 (s, 8C), 1.4 (br, 1C);  $^{11}\text{B}\{^1\text{H}\}$  NMR (160 MHz,  $\text{C}_6\text{D}_6$ )  $\delta$ : 30.6; HRMS (ESI)  $m/z$  calcd for  $\text{C}_{13}\text{H}_{30}\text{B}_2\text{NaO}_4$   $[\text{M}+\text{Na}]^+$  295.2222, found 295.2210; IR (neat)  $\text{cm}^{-1}$  2972, 1468, 1370.

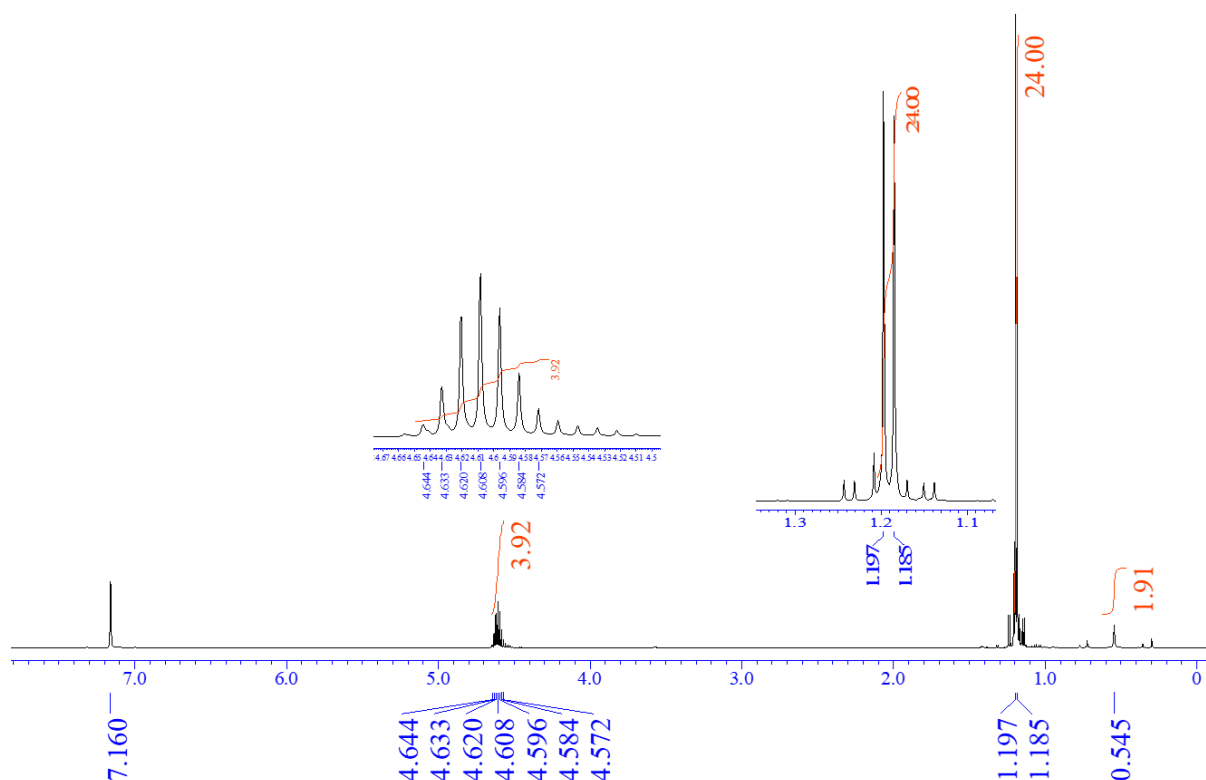

**Figure S1.**  $^1\text{H}$  NMR spectrum of compound **3** ( $\text{C}_6\text{D}_6$ , 500 MHz).

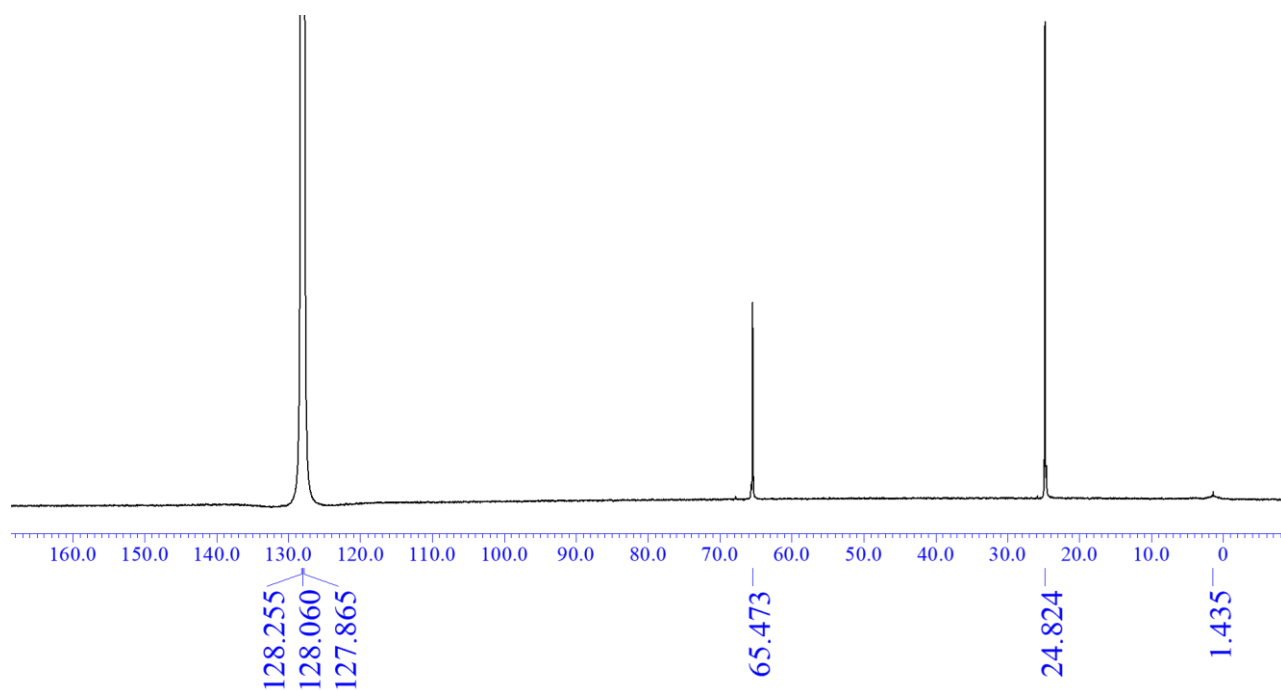

**Figure S2.** <sup>13</sup>C NMR spectrum of compound **3** (C<sub>6</sub>D<sub>6</sub>, 126 MHz).

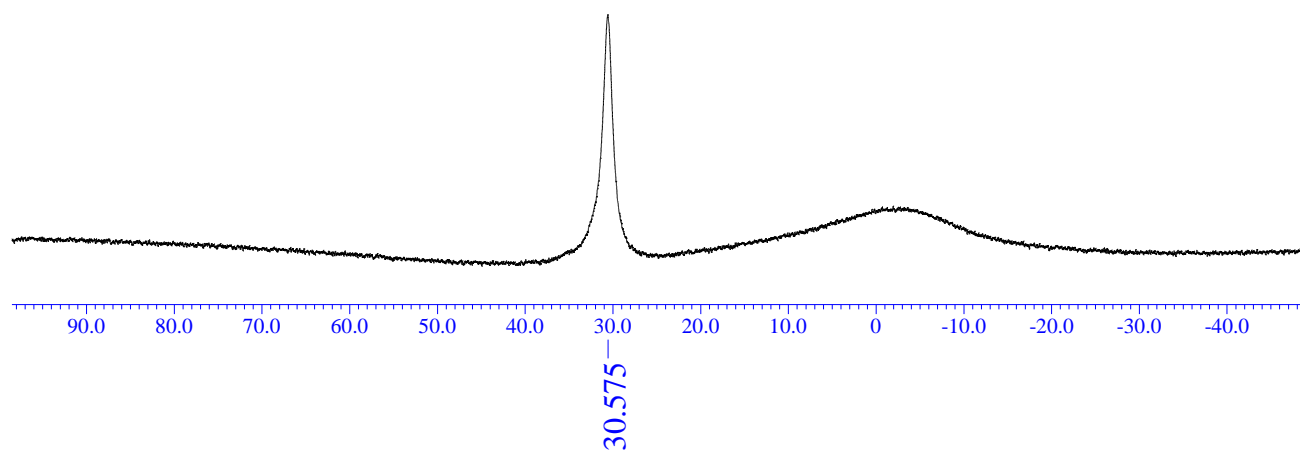

**Figure S3.** <sup>11</sup>B{<sup>1</sup>H} NMR spectrum of compound **3** (C<sub>6</sub>D<sub>6</sub>, 160 MHz).

# **Lithium 1,2-diphenyl-3-(2-propoxy)-4,4-di(2-propoxy)-1,2-diaza-3,5-diborolanate (4)**

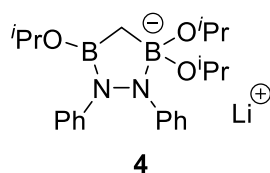

To a solution of hydrazobenzene (3.39 g, 18.4 mmol) in THF (80 mL), methyllithium solution in diethyl ether (Br free) (1.04 M, 36 mL, 37.4 mmol) was added dropwise at -78 °C. After the mixture was stirred at -78 °C for 3 h, compound **3** was added at -78 °C. The mixture was stirred at -78 °C for 30 min, then at room temperature for 12 h. The solvent was removed under reduced pressure. The residue was recrystallized from toluene at -35 °C to afford the desired compound **4** as colourless crystals. The obtained crystals were washed well with hexane (6.78 g, 92% yield). Although **4** was obtained as crystal in almost pure form, <sup>1</sup>H and <sup>13</sup>C NMR spectra always show complicated mixture probably due to the dynamic dissociation and recombination of isopropoxy groups, see Figure S4 and S5. The obtained solid was used in the next step to synthesize **5**.

<sup>1</sup>H NMR (500 MHz, THF-*d*<sub>8</sub>) see Figure S4; <sup>13</sup>C NMR (126 MHz, THF-*d*<sub>8</sub>) see Figure S5; <sup>11</sup>B{<sup>1</sup>H} NMR (160 MHz, THF-*d*<sub>8</sub>); 38.5, 8.50; HRMS (ESI) *m/z* calcd for C<sub>22</sub>H<sub>34</sub>B<sub>2</sub>LiN<sub>2</sub>O<sub>3</sub> [M+H]<sup>+</sup> 403.2910, found 403.2896; IR (neat) cm<sup>-1</sup> 3327, 2962, 2922, 2872, 1589, 1485.

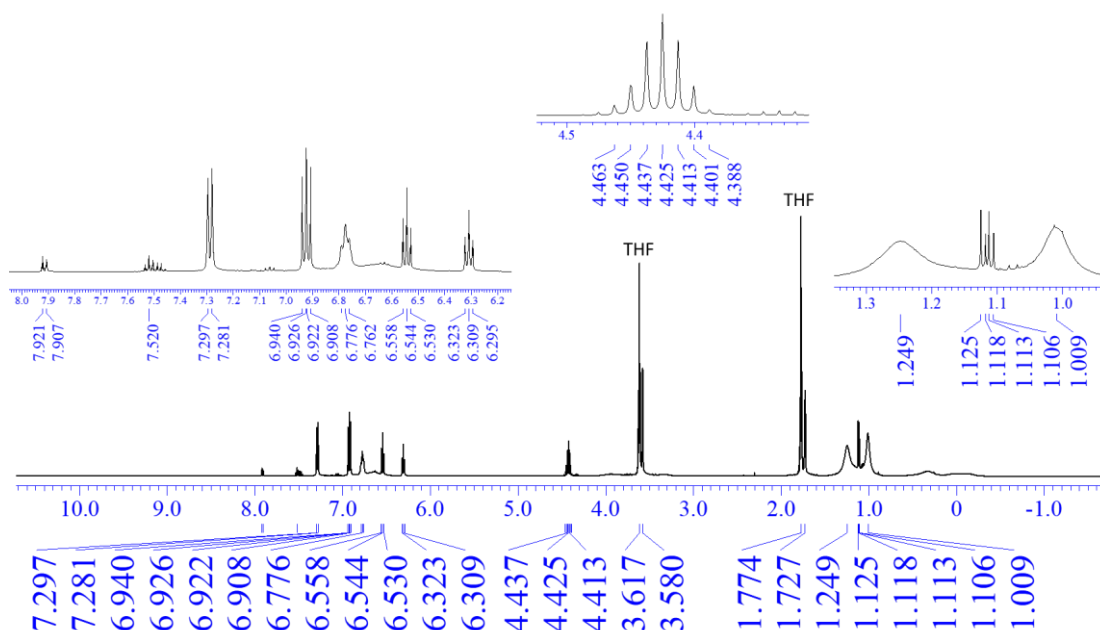

**Figure S4.** <sup>1</sup>H NMR spectrum of compound **4** (THF-*d*<sub>8</sub>, 500 MHz).

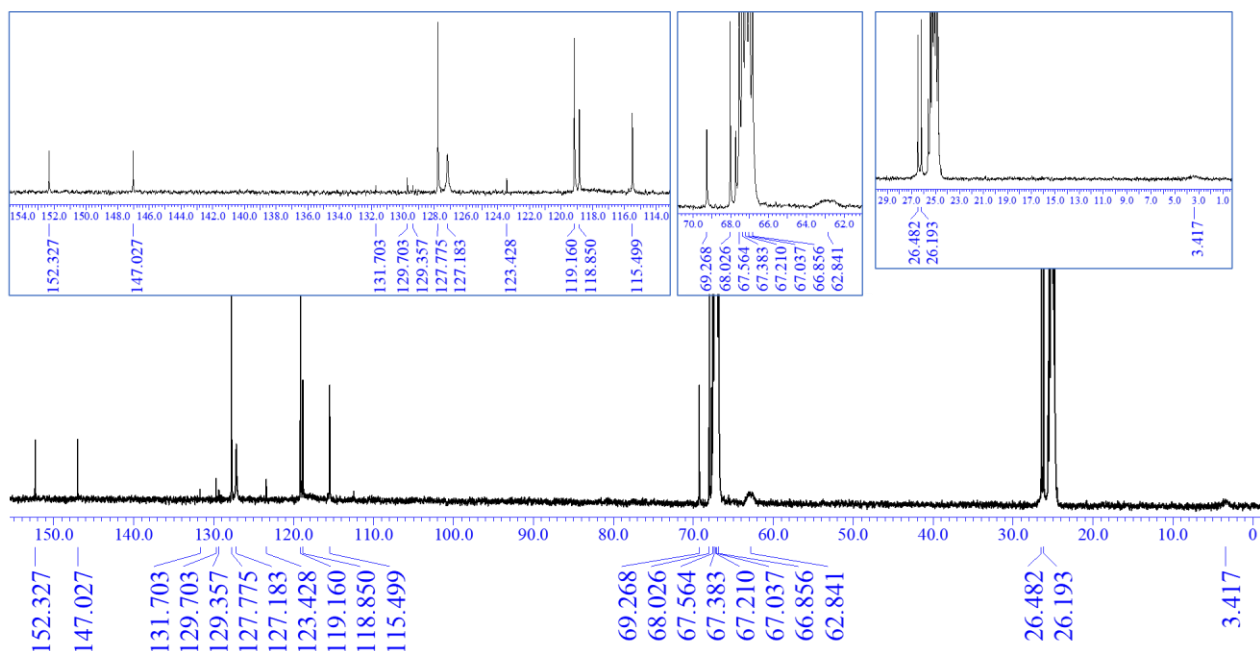

Figure S5.  $^{13}\text{C}$  NMR spectrum of compound **4** (THF- $d_8$ , 126 MHz).

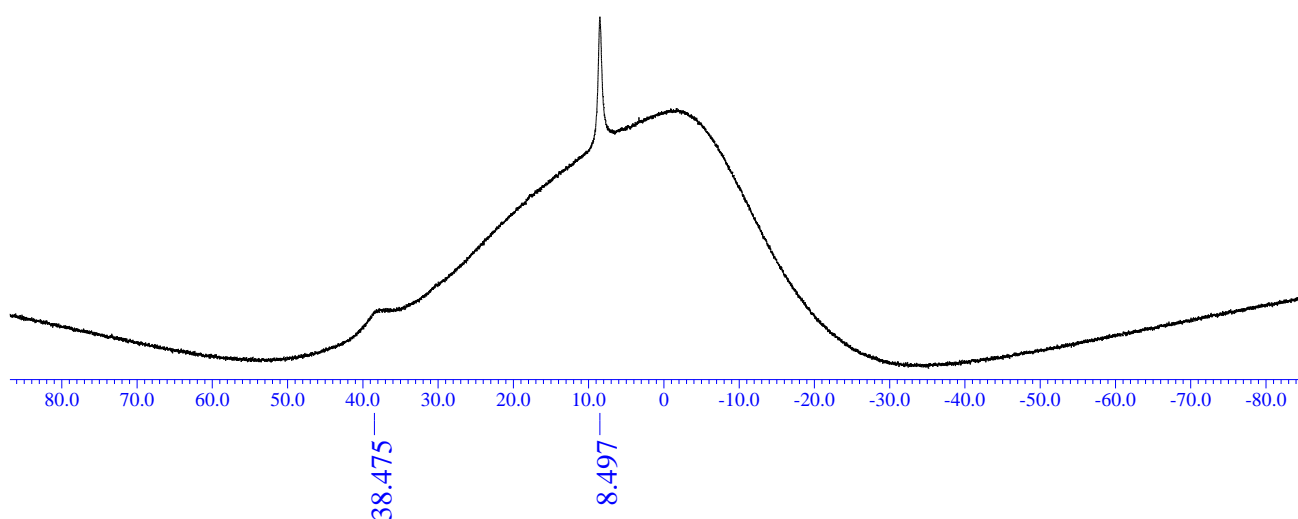

Figure S6.  $^{11}\text{B}\{^1\text{H}\}$  NMR spectrum of compound **4** (THF- $d_8$ , 160 MHz).

### 1,2-diphenyl-3,5-bis(di-*tert*-butylphosphinomethyl)-1,2-diaza-3,5-diborolane (**5**)

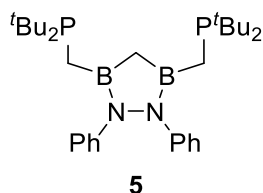

To a solution of **4** (2.15 g, 5.34 mmol) in diethyl ether (70 mL), di-*tert*-butylphosphinomethyl lithium (1.50 g, 9.02 mmol) was added at  $-35\text{ }^{\circ}\text{C}$ . The mixture was settled at  $-35\text{ }^{\circ}\text{C}$  for 15 min, then stirred at room temperature for 19 h. The solvent was removed under reduced pressure. The residue was extracted with

hexane. Recrystallization from diethyl ether afforded the desired compound **5** as colourless crystals. The obtained crystals were washed with cold pentane and dried under vacuum (1.04 g, 43% yield).

$^1\text{H}$  NMR (500 MHz,  $\text{C}_6\text{D}_6$ )  $\delta$ : 7.17 (d, 4H, overlapped with benzene), 6.98 (t,  $J = 7.3$  Hz, 4H), 6.74 (t,  $J = 7.3$  Hz, 2H), 1.55 (s, 2H), 1.29 (d,  $J = 4.3$  Hz, 4H), 1.05 (d,  $J = 10.7$  Hz, 36H);  $^{13}\text{C}$  NMR (126 MHz,  $\text{C}_6\text{D}_6$ )  $\delta$ : 142.8 (s, 2C), 128.5 (s, 2C), 125.8 (s, 4C), 124.8 (s, 2C), 31.5 (d,  $J = 25.8$  Hz, 4C), 29.8 (d,  $J = 14.3$  Hz, 12C), 18.5 (br, 1C), 10.3 (br, d,  $J = 32.4$  Hz, 2C);  $^{11}\text{B}\{^1\text{H}\}$  NMR (160 MHz,  $\text{C}_6\text{D}_6$ )  $\delta$ : 49.2;  $^{31}\text{P}\{^1\text{H}\}$  NMR (202 MHz,  $\text{C}_6\text{D}_6$ )  $\delta$ : 33.5; Elem. Anal. calcd for  $\text{C}_{31}\text{H}_{52}\text{B}_2\text{N}_2\text{P}_2$  C, 69.42; H, 9.77; N, 5.22; found C, 69.19; H, 9.61; N, 5.23; IR (neat)  $\text{cm}^{-1}$  2938, 2860, 1598, 1490.

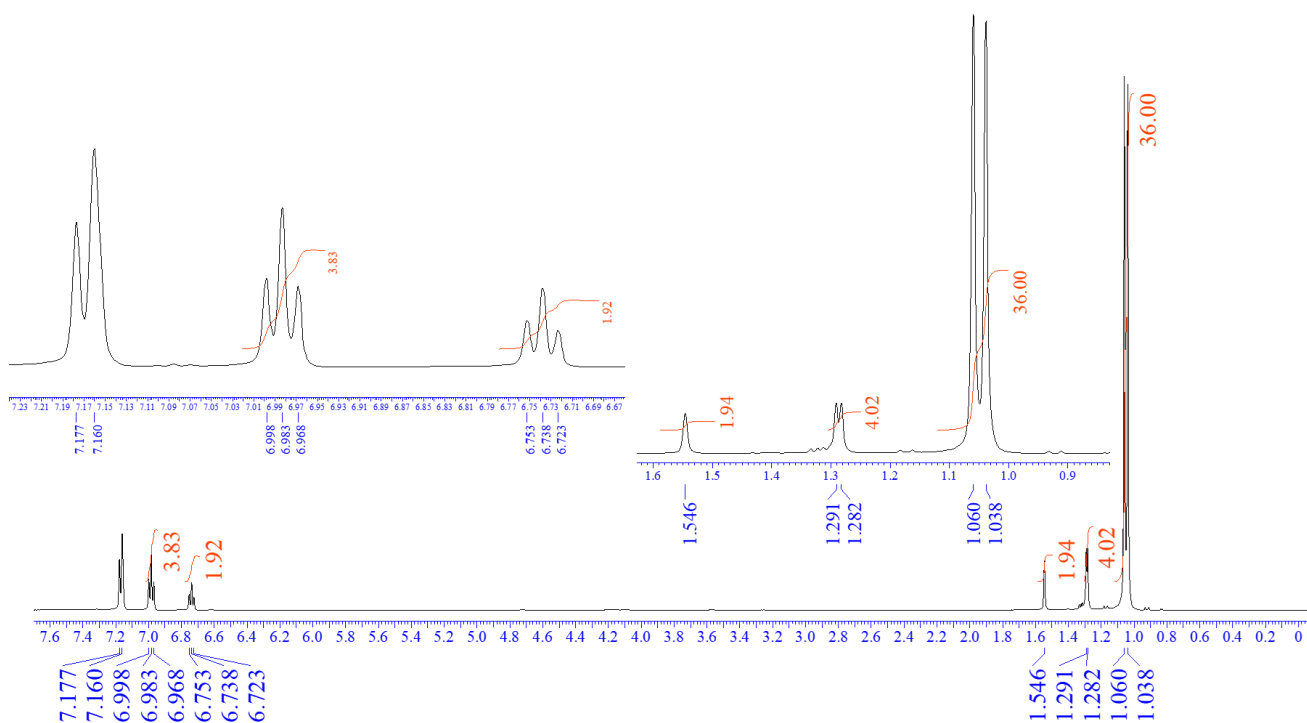

**Figure S7.**  $^1\text{H}$  NMR spectrum of compound **5** ( $\text{C}_6\text{D}_6$ , 500 MHz).

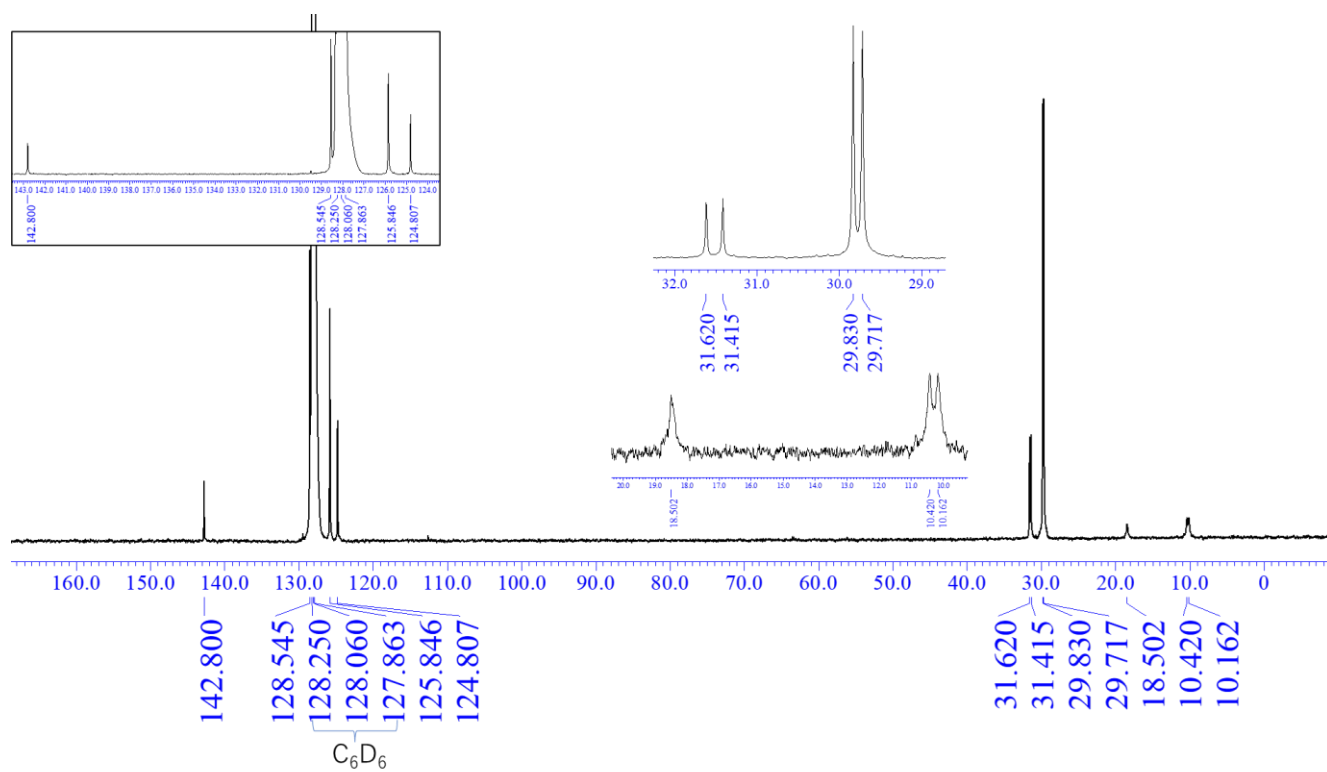

**Figure S8.**  $^{13}C$  NMR spectrum of compound **5** ( $C_6D_6$ , 126 MHz).

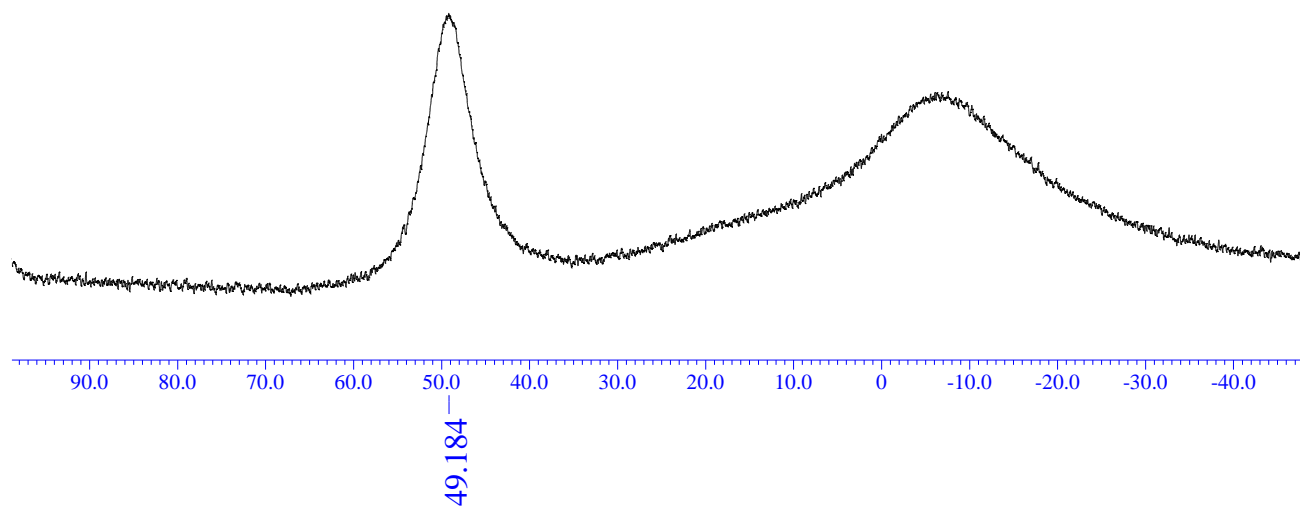

**Figure S9.**  $^{11}B\{^1H\}$  NMR spectrum of compound **5** ( $C_6D_6$ , 160 MHz).

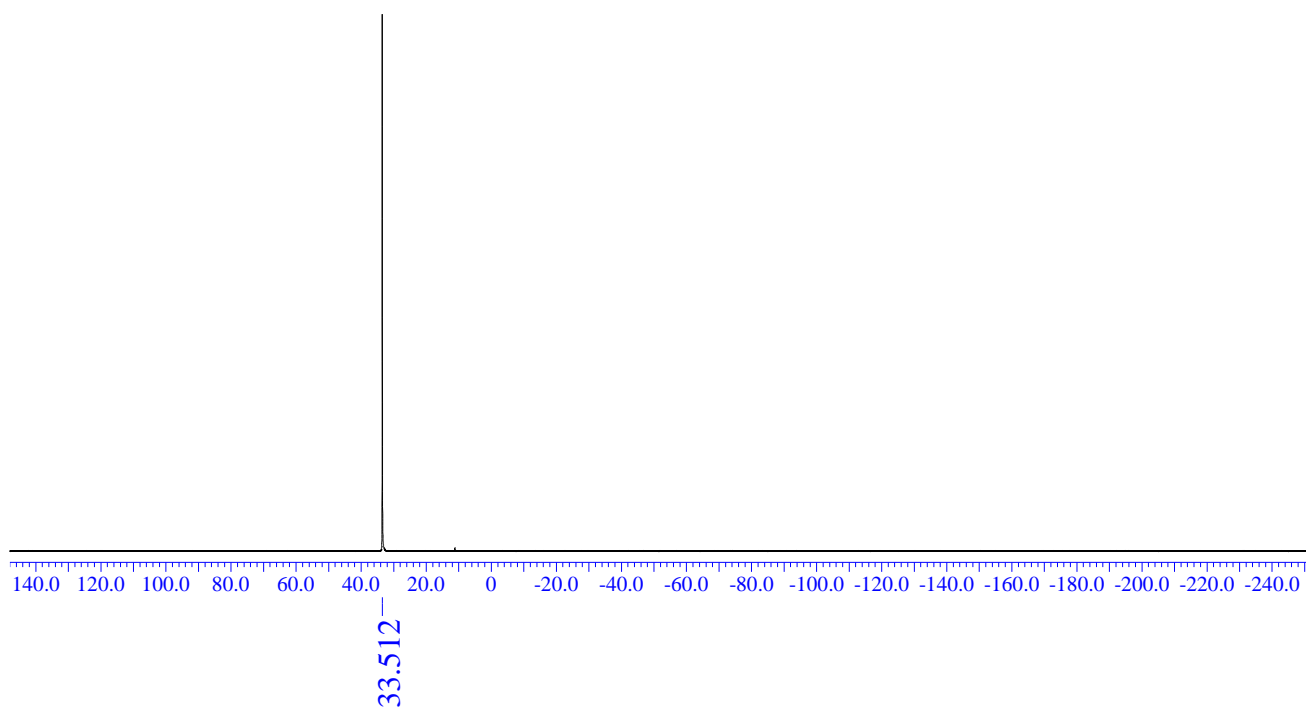

**Figure S10.**  $^{31}\text{P}\{^1\text{H}\}$  NMR spectrum of compound **5** ( $\text{C}_6\text{D}_6$ , 202 MHz).

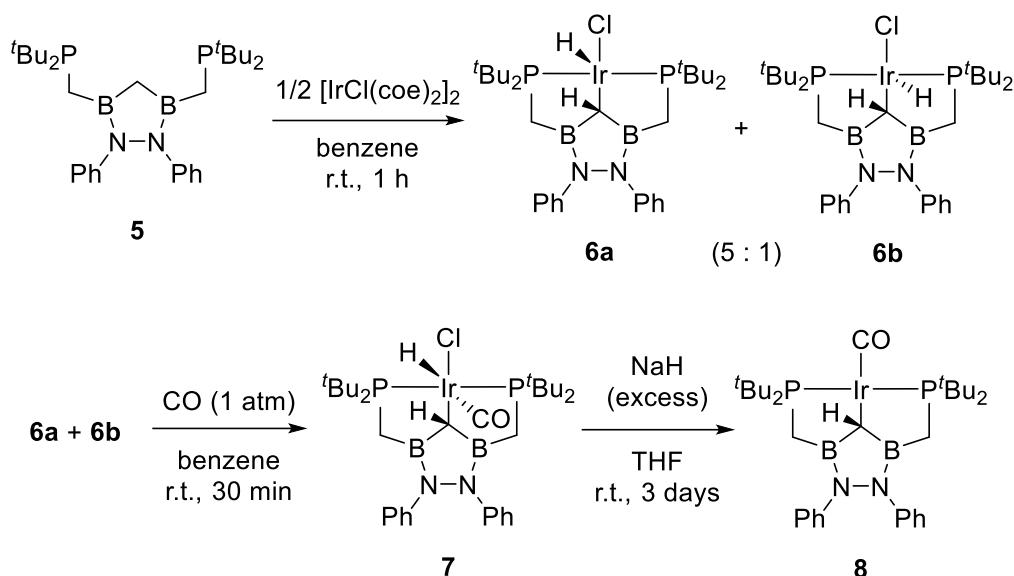

**Scheme S2.** The entire synthetic routes for complexes **6a**, **6b**, **7**, and **8**.

### 6a and 6b

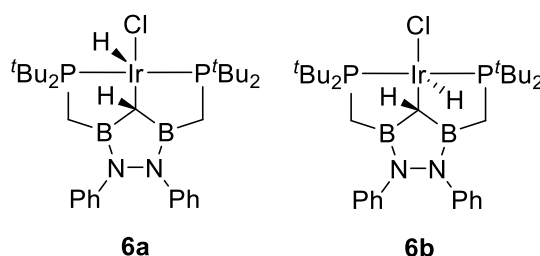

To a solution of compound **5** (203.0 mg, 0.3784 mmol) in benzene (20 mL), chloridobis(cyclooctene)iridium dimer (169.6 mg, 0.1892 mmol) was added at room temperature. The mixture was stirred at room temperature for 2 h. All the volatiles were removed under reduced pressure to afford the mixture of two isomers of iridium hydride chloride complexes **6a** and **6b** as red solid (279.3 mg, 97% yield in total). Recrystallization from this mixture by slow evaporation of the pentane solution afforded crystals of **6a** and **6b** mixture. Single crystal of **6b** could be obtained after sublimation of the mixture of **6a** and **6b** at 200°C followed by successive recrystallization from benzene/pentane and the structure was determined by single crystal X-ray diffraction analysis. Because **6a** and **6b** were inseparable in chromatographic technique, both are characterized by NMR as the obtained mixture (**6a**:**6b**=5:1, Figures S11–14) and crude mixture containing **6b** as a major component obtained after sublimation (Figures S15–18).

**6a**:  $^1\text{H}$  NMR (500 MHz,  $\text{C}_6\text{D}_6$ )  $\delta$ : 7.22 (d,  $J = 7.4$  Hz, 4H), 7.06 (t,  $J = 7.4$  Hz, 4H), 6.77 (t,  $J = 7.4$  Hz, 2H), 2.90 (d,  $J = 5.8$  Hz, 1H), 1.97 (dvt,  $J = 14.8, 5.8$  Hz, 2H), 1.42 (m, 2H), 1.35 (vt,  $J = 6.8$  Hz, 18H), 1.28 (vt,  $J = 6.8$  Hz, 18H), -47.48 (dt,  $J = 5.8, 11.7$  Hz, 1H);  $^{13}\text{C}$  NMR (126 MHz,  $\text{C}_6\text{D}_6$ )  $\delta$ : 144.7 (s, 2C), 128.9 (s, 4C), 122.8 (s, 2C), 121.9 (s, 4C), 38.0 (vt,  $J = 8.2$  Hz, 2C), 35.8 (vt,  $J = 8.2$  Hz, 2C), 30.5 (s, 6C), 28.6 (s, 6C), 11.4 (br, 1C), 2.7 (br, 2C);  $^{11}\text{B}\{^1\text{H}\}$  NMR (160 MHz,  $\text{C}_6\text{D}_6$ )  $\delta$ : 44.8;  $^{31}\text{P}\{^1\text{H}\}$  NMR (202 MHz,  $\text{C}_6\text{D}_6$ )  $\delta$ : 8.0 (d,  $J = 12.4$  Hz).

**6b**:  $^1\text{H}$  NMR (500 MHz,  $\text{C}_6\text{D}_6$ )  $\delta$ : 7.25 (d,  $J = 7.4$  Hz, 4H), 7.08 (t,  $J = 7.4$  Hz, 4H), 6.76 (t,  $J = 7.4$  Hz, 2H), 3.30 (s, 1H), 1.96 (dvt,  $J = 14.8, 5.8$  Hz, 2H), 1.39 (vt,  $J = 6.6$  Hz, 18H), 1.17 (vt,  $J = 6.6$  Hz, 18H), 1.11 (m, 2H), -44.73 (t,  $J = 5.8, 11.7$  Hz, 1H).

= 11.3 Hz, 1H);  $^{13}\text{C}$  NMR (126 MHz,  $\text{C}_6\text{D}_6$ )  $\delta$ : 145.3 (s, 2C), 129.0 (s, 4C), 122.7 (s, 2C), 121.4 (s, 4C), 37.9 (vt,  $J$  = 7.3 Hz, 2C), 35.6 (vt,  $J$  = 9.5 Hz, 2C), 29.9 (s, 6C), 29.6 (s, 6C), 17.0 (br, 1C), 4.8 (br, 2C);  $^{11}\text{B}\{^1\text{H}\}$  NMR (160 MHz,  $\text{C}_6\text{D}_6$ )  $\delta$ : 48.8;  $^{31}\text{P}\{^1\text{H}\}$  NMR (202 MHz,  $\text{C}_6\text{D}_6$ )  $\delta$ : 15.4 (d,  $J$  = 10.0 Hz).

Mixture of **6a** and **6b**: Elem. Anal. calcd for  $\text{C}_{31}\text{H}_{52}\text{B}_2\text{N}_2\text{P}_2\text{ClIr}$  C, 48.74; H, 6.86; N, 3.67; found C, 48.43; H, 6.98; N, 3.35; IR (neat)  $\text{cm}^{-1}$  2896, 1937, 1597, 1488.

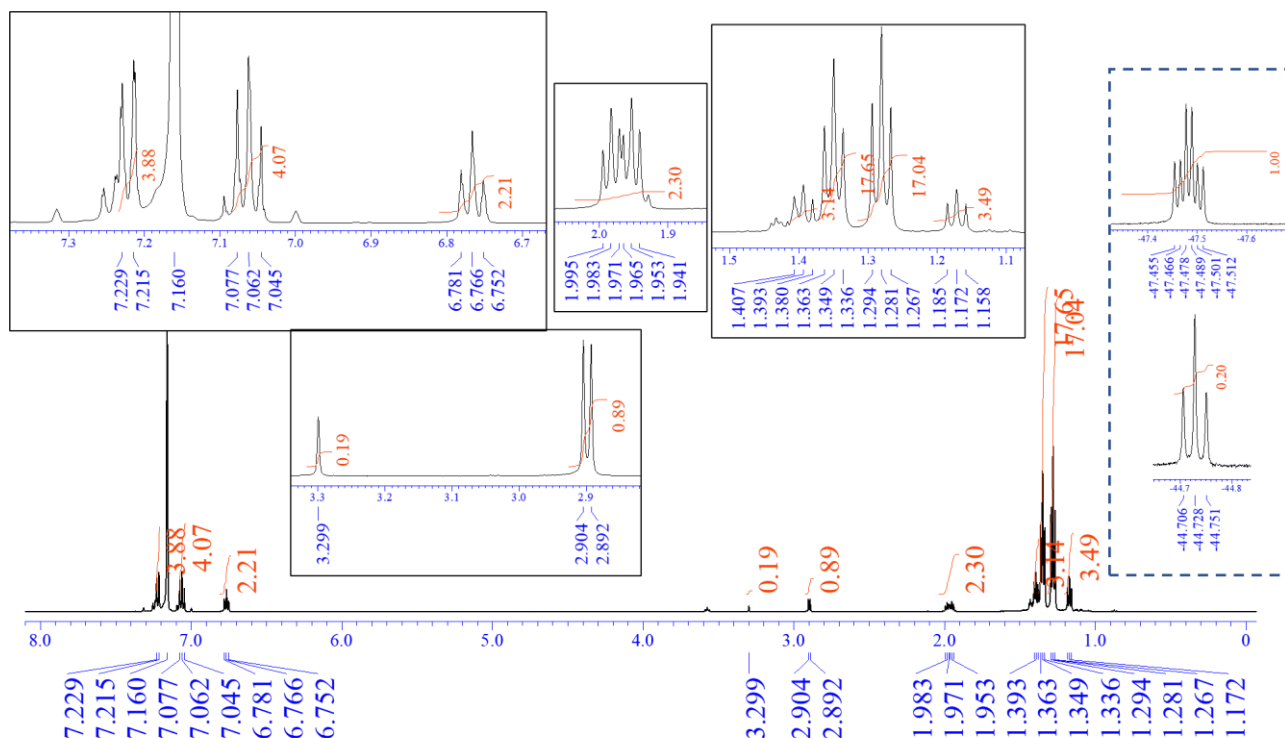

**Figure S11.**  $^1\text{H}$  NMR spectrum of compounds **6a** and **6b** (6a:6b=5:1,  $\text{C}_6\text{D}_6$ , 500 MHz). Hydride region is separately shown in the dashed box.

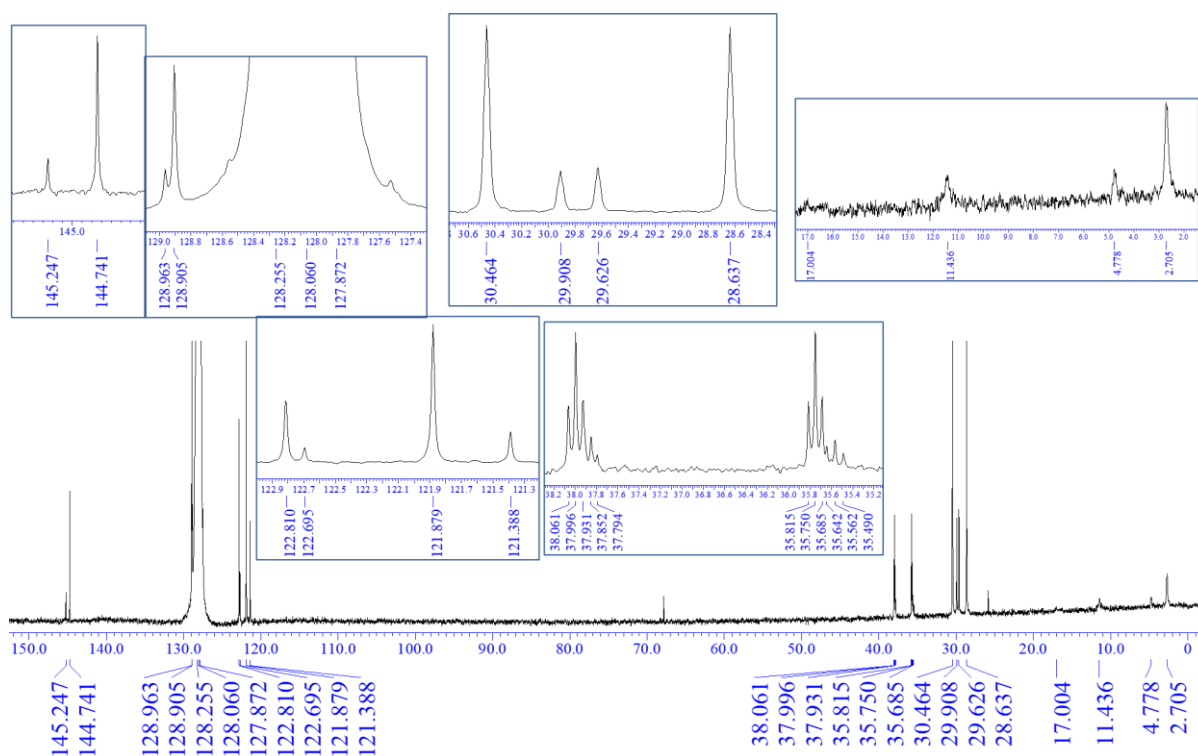

**Figure S12.**  $^{13}\text{C}$  NMR spectrum of compounds **6a** and **6b** (6a:6b=5:1,  $\text{C}_6\text{D}_6$ , 126 MHz).

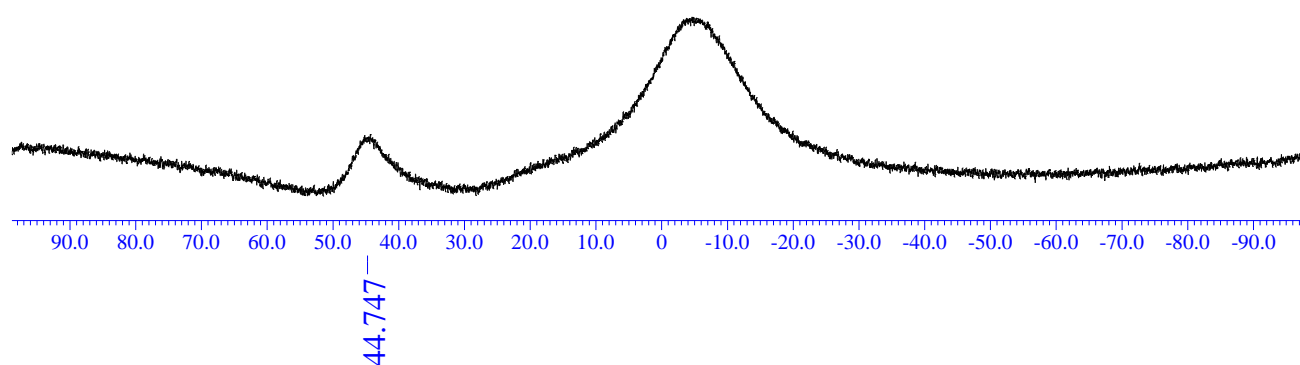

**Figure S13.**  $^{11}\text{B}\{^1\text{H}\}$  NMR spectrum of compounds **6a** and **6b** (6a:6b=5:1,  $\text{C}_6\text{D}_6$ , 160 MHz).

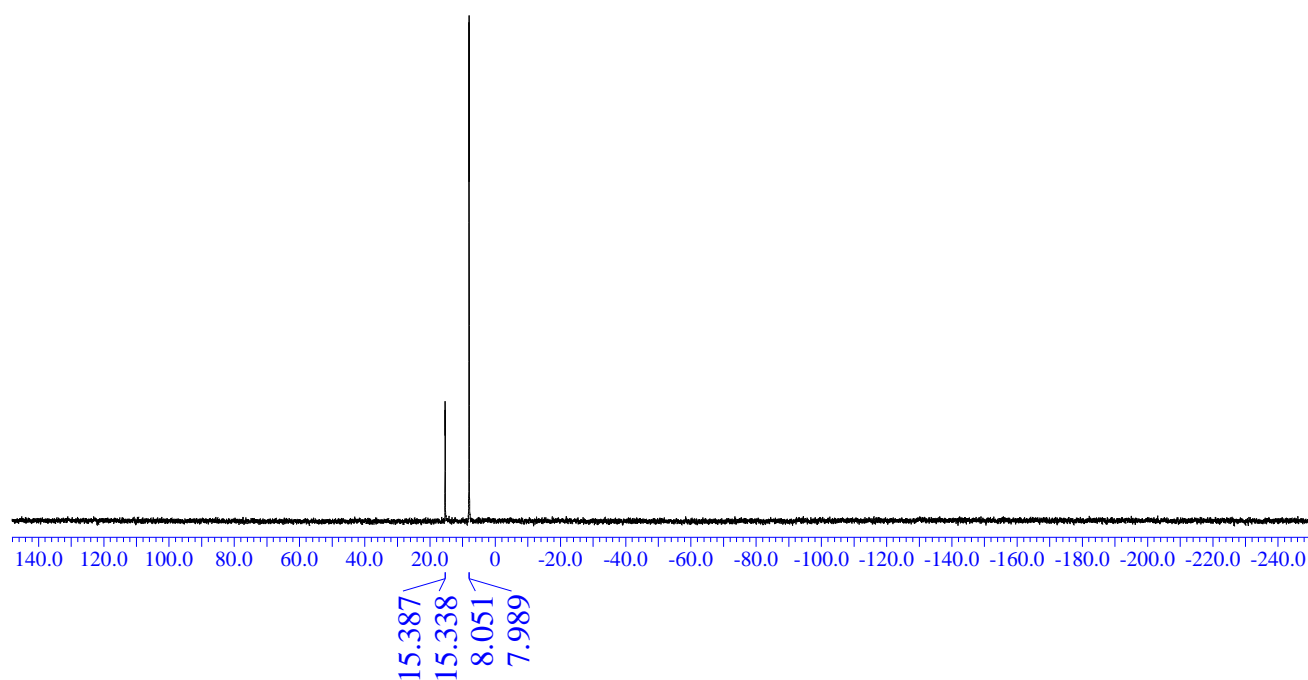

**Figure S14.**  $^{31}\text{P}\{^1\text{H}\}$  NMR spectrum of compounds **6a** and **6b** (6a:6b=5:1,  $\text{C}_6\text{D}_6$ , 202 MHz).

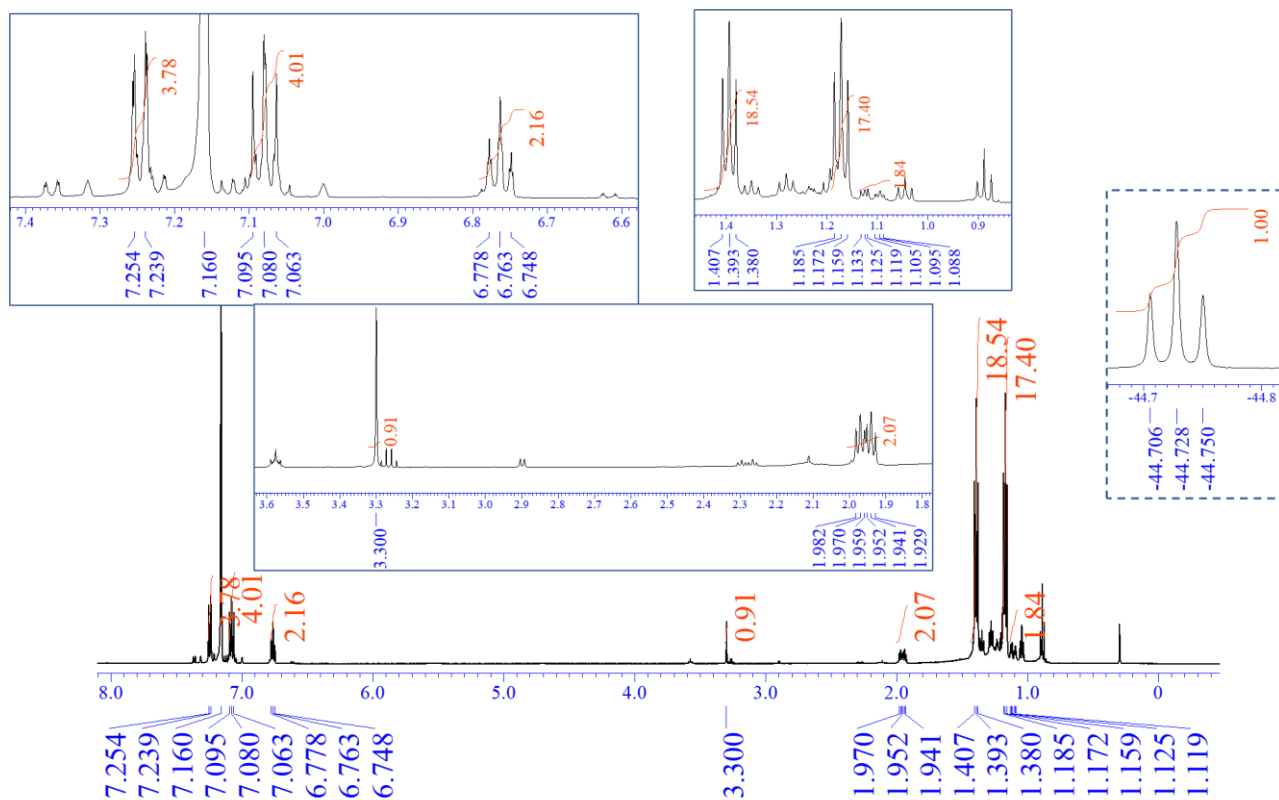

**Figure S15.**  $^1\text{H}$  NMR spectrum of the crude product after sublimation containing **6b** as the main component ( $\text{C}_6\text{D}_6$ , 500 MHz). Hydride region is separately shown in the dashed box.

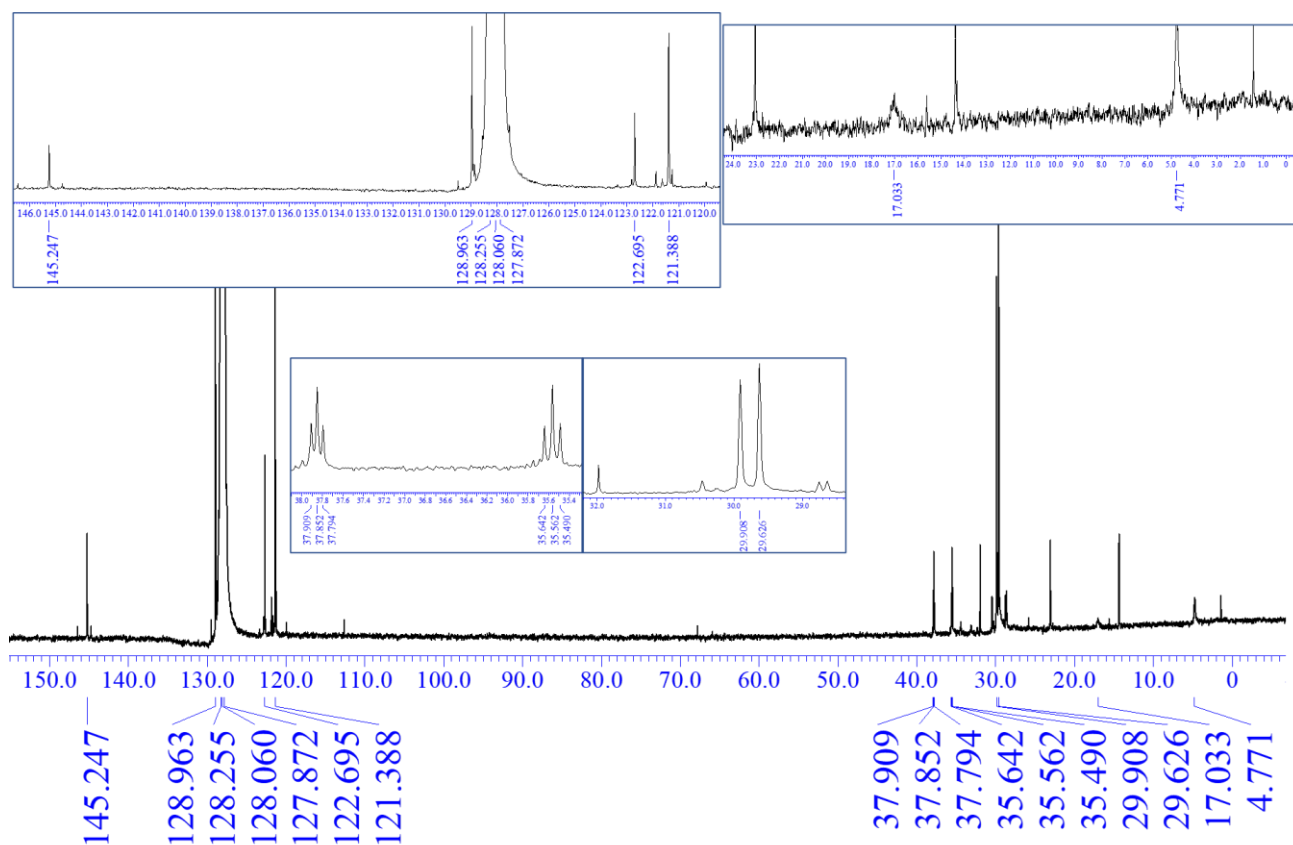

**Figure S16.**  $^{13}\text{C}$  NMR spectrum of the crude product after sublimation containing **6b** as the main component ( $\text{C}_6\text{D}_6$ , 126 MHz).

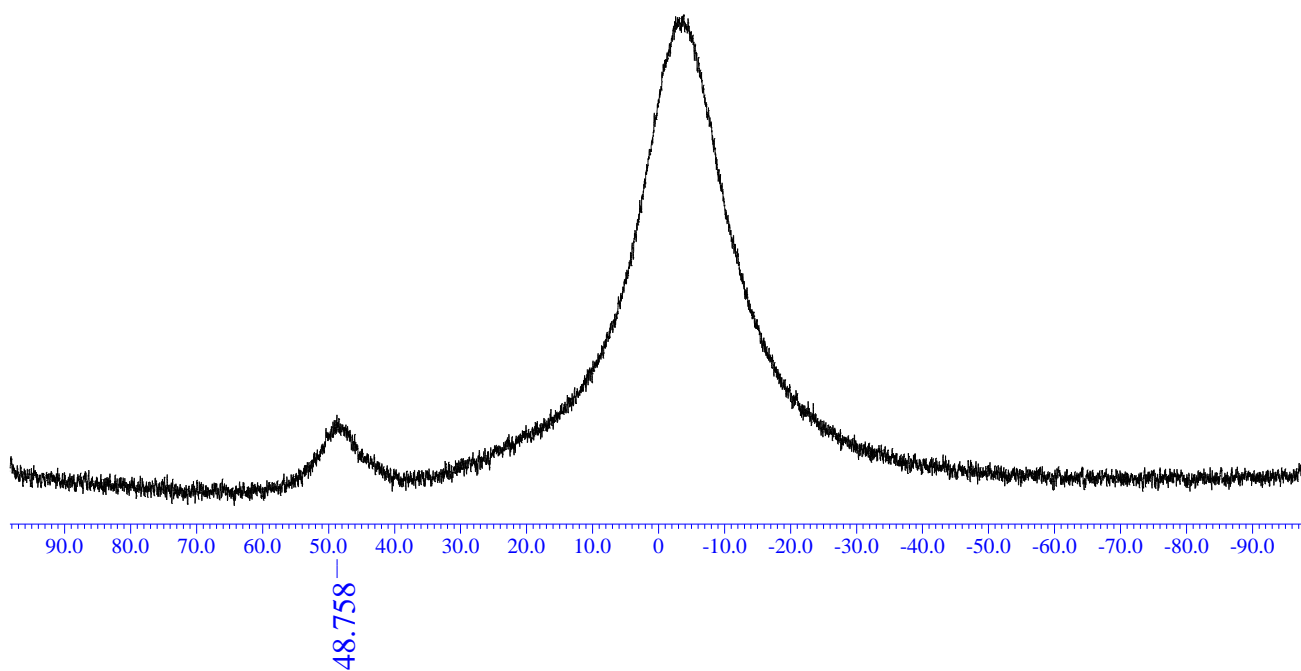

**Figure S17.**  $^{11}\text{B}\{^1\text{H}\}$  NMR spectrum of the crude product after sublimation containing **6b** as the main component ( $\text{C}_6\text{D}_6$ , 160 MHz).

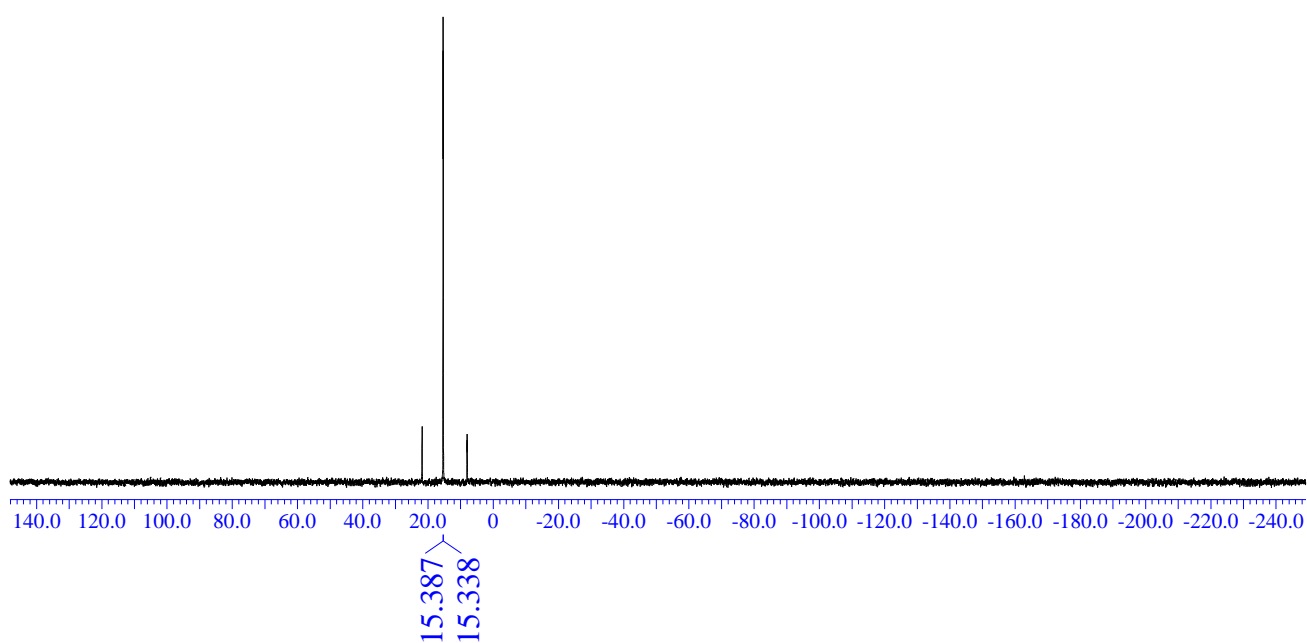

**Figure S18.**  $^{31}\text{P}\{^1\text{H}\}$  NMR spectrum of the crude product after sublimation containing **6b** as the main component ( $\text{C}_6\text{D}_6$ , 202 MHz).

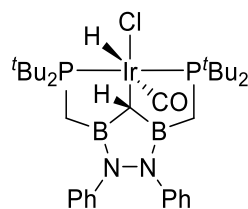

7

To a Schlenk tube which contained a solution of the mixture of compounds **6a** and **6b** (100.3 mg, 0.1313 mmol) in benzene (10 mL), ambient pressure of carbon monoxide was introduced. The solution was stirred at room temperature for 1 hour. After removal of the volatiles, complex **7** was obtained as pale-yellow solid (103.2 mg, 99% yield). This solid could be further purified by recrystallization from the toluene/pentane solution.

NMR spectra were recorded at 15 °C because **7** was gradually decomposed in the C<sub>6</sub>D<sub>6</sub> solution at ambient temperature.

<sup>1</sup>H NMR (500 MHz, C<sub>6</sub>D<sub>6</sub>) δ: 7.21 (d, *J* = 7.4 Hz, 4H), 7.05 (t, *J* = 7.4 Hz, 4H), 6.78 (t, *J* = 7.4 Hz, 2H), 2.12 (dvt, *J* = 15.9, 5.2 Hz, 2H), 1.94 (d, *J* = 1.9 Hz, 1H), 1.42 (vt, *J* = 6.8 Hz, 18H), 1.36 (vt, *J* = 7.2 Hz, 18H), 1.10 (dvt, *J* = 2.4, 16.2 Hz, 2H), -6.74 (td, *J* = 15.8, 2.1 Hz, 1H); <sup>13</sup>C NMR (126 MHz, C<sub>6</sub>D<sub>6</sub>) δ: 182.6 (s, 1C), 142.9 (s, 2C), 128.8 (s, 4C), 123.5 (s, 2C), 123.4 (s, 4C), 38.2 (vt, *J* = 8.1 Hz, 2C), 37.3 (vt, *J* = 11.0 Hz, 2C), 31.3 (s, 6C), 28.7 (s, 6C), 11.0 (br, 1C), 6.0 (br, 2C); <sup>11</sup>B{<sup>1</sup>H} NMR (160 MHz, C<sub>6</sub>D<sub>6</sub>) δ: 46.5; <sup>31</sup>P{<sup>1</sup>H} NMR (202 MHz, C<sub>6</sub>D<sub>6</sub>) δ: 10.0 (s); Elem. Anal. calcd for C<sub>32</sub>H<sub>52</sub>B<sub>2</sub>N<sub>2</sub>OP<sub>2</sub>ClIr C, 48.53; H, 6.62; N, 3.54; found C, 48.47; H, 6.70; N, 3.33; IR (neat) cm<sup>-1</sup> 2899, 2157, 1986, 1597.

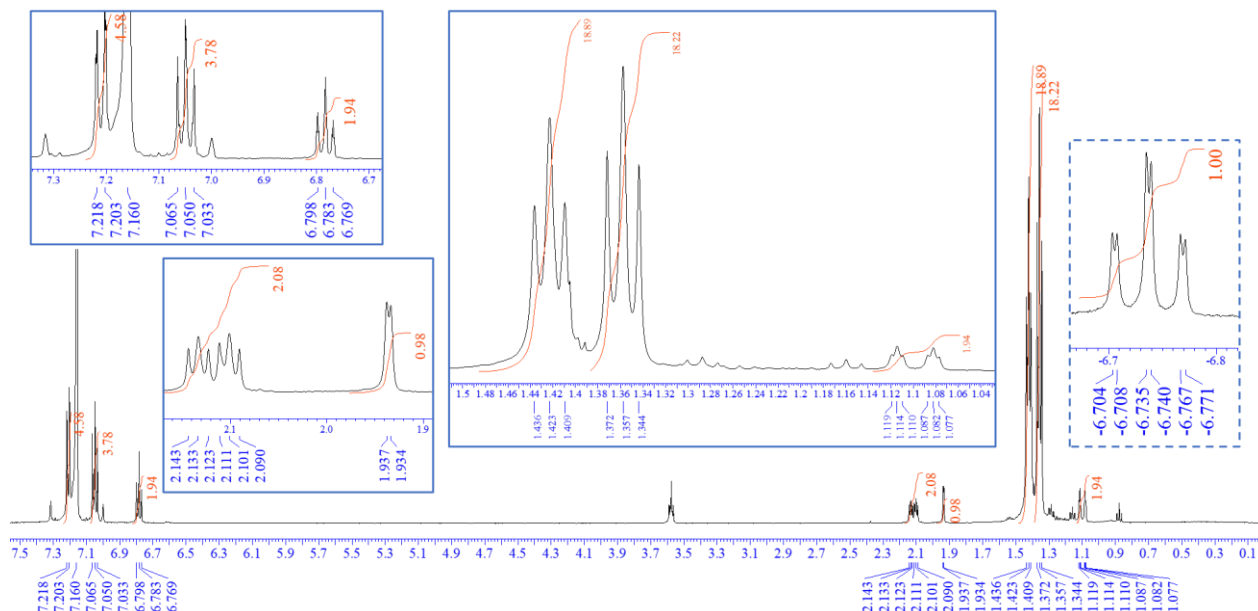

**Figure S19.** <sup>1</sup>H NMR spectrum of **7** (C<sub>6</sub>D<sub>6</sub>, 500 MHz). Hydride region is separately shown in the dashed box.

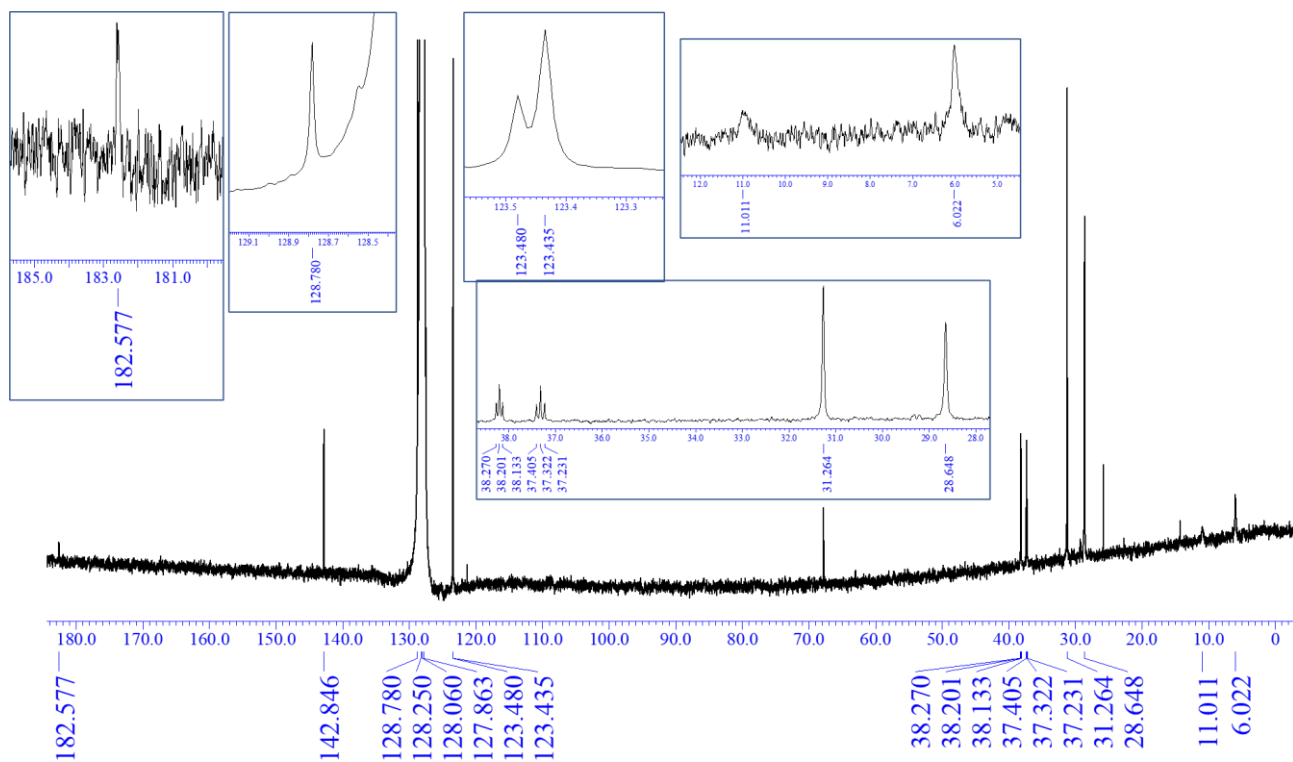

**Figure S20.**  $^{13}\text{C}$  NMR spectrum of **7** ( $\text{C}_6\text{D}_6$ , 126 MHz).

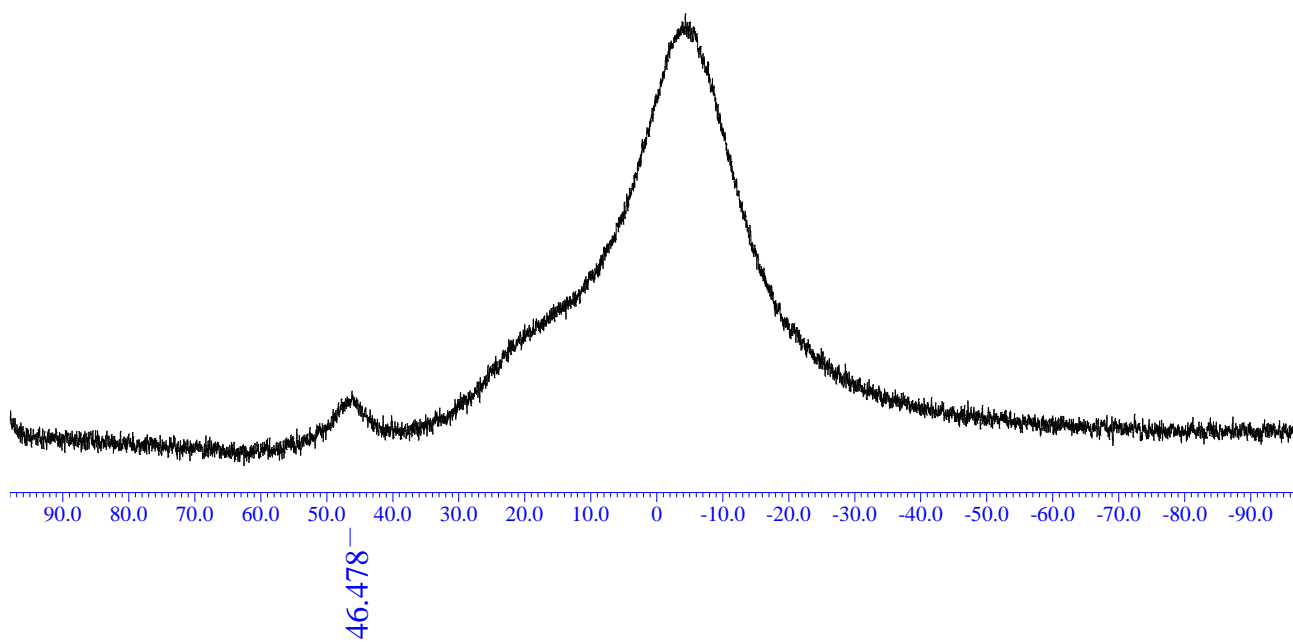

**Figure S21.**  $^{11}\text{B}\{^1\text{H}\}$  NMR spectrum of **7** ( $\text{C}_6\text{D}_6$ , 160 MHz).

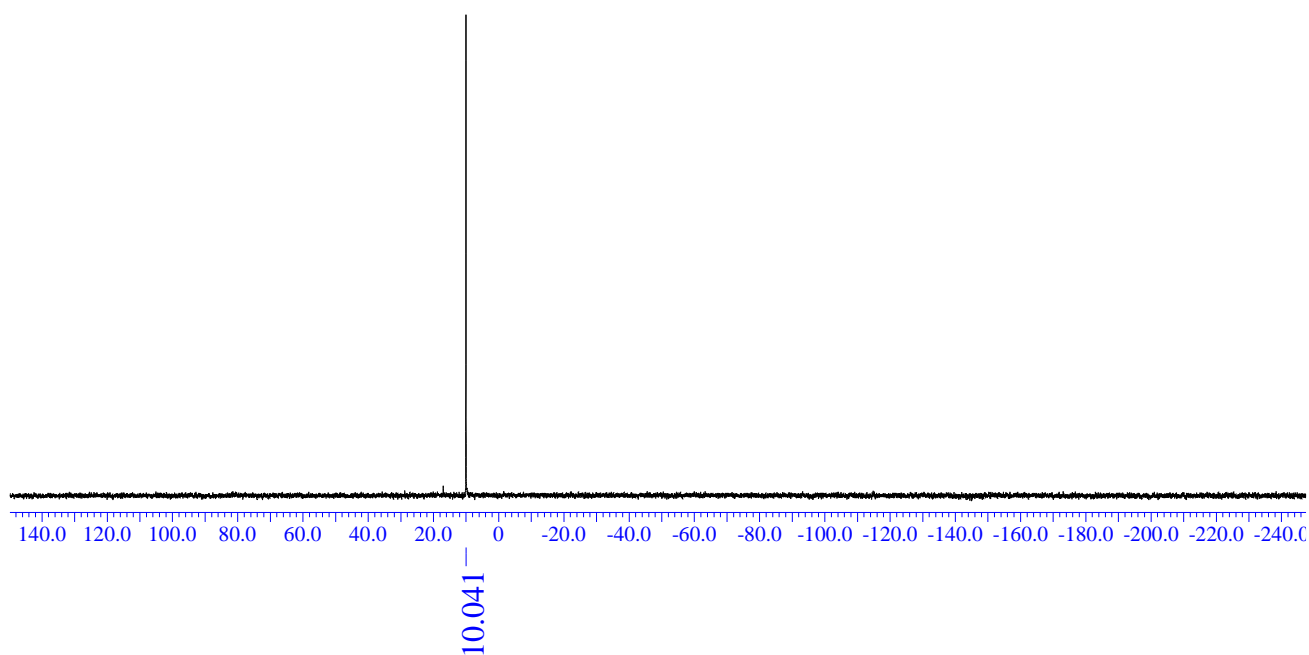

**Figure S22.**  $^{31}\text{P}\{^1\text{H}\}$  NMR spectrum of **7** ( $\text{C}_6\text{D}_6$ , 202 MHz).

**8**

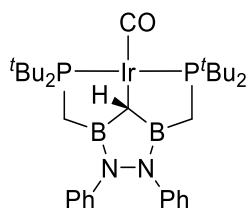

**8**

To a solution of complex **7** (49.8 mg, 62.9  $\mu\text{mol}$ ) in THF (7 mL), sodium hydride (28.5 mg, 1.19 mmol) was added. The mixture was stirred vigorously at room temperature for 3 days. After removal of insoluble species by filtration, the solvent was removed under reduced pressure. Complex **8** was obtained as yellow solid (45.9 mg, 97% yield). The solid can be further purified by recrystallization from the toluene/pentane solution.

Generation of complex **8** was also observed by heating complex **7** at 40°C in  $\text{C}_6\text{D}_6$  solution. A portion of complex **7** was dissolved in  $\text{C}_6\text{D}_6$  in a sealed J-Young NMR tube, then heated to 30°C. Conversion of **7** was confirmed by  $^1\text{H}$  and  $^{31}\text{P}$  NMR analyses. The peak area of methine proton was employed and silicon grease was used for internal standard for quantitative analysis. After 4 days of heating, 91% conversion of **7** and generation of complex **8** was confirmed (38% yield). Decomposition products other than complex **8** could not be identified (see Figure S27 and S28).

$^1\text{H}$  NMR (500 MHz,  $\text{C}_6\text{D}_6$ )  $\delta$ : 7.29 (d,  $J = 7.6$  Hz, 4H), 7.10 (t,  $J = 7.6$  Hz, 4H), 6.77 (t,  $J = 7.6$  Hz, 2H), 2.36 (s, 1H), 2.10 (dvt,  $J = 15.3, 4.6$  Hz, 2H), 1.35 (dvt,  $J = 15.3, 4.6$  Hz, 2H), 1.29 (vt,  $J = 6.4$  Hz, 18H), 1.17 (vt,  $J = 6.4$  Hz, 18H);  $^{13}\text{C}$  NMR (126 MHz,  $\text{C}_6\text{D}_6$ )  $\delta$ : 184.1 (s, 1C), 145.6 (s, 2C), 128.9 (s, 4C), 122.1 (s, 2C), 121.4 (s, 4C), 52.6 (br, 1C), 35.9 (vt,  $J = 10.4$  Hz, 2C), 35.6 (vt,  $J = 10.4$  Hz, 2C), 29.4 (s, 6C), 29.3 (s, 6C), 3.0 (br, 2C);  $^{11}\text{B}\{^1\text{H}\}$  NMR (160 MHz,  $\text{C}_6\text{D}_6$ )  $\delta$ : 45.9;  $^{31}\text{P}\{^1\text{H}\}$  NMR (202 MHz,  $\text{C}_6\text{D}_6$ )  $\delta$ : 17.1; Elem. Anal. calcd for  $\text{C}_{32}\text{H}_{51}\text{B}_2\text{N}_2\text{OP}_2\text{Ir}$  C, 50.87; H, 6.80; N, 3.71; found C, 50.84; H, 7.04; N, 3.45; IR (neat)  $\text{cm}^{-1}$  2898, 1967, 1904, 1597.

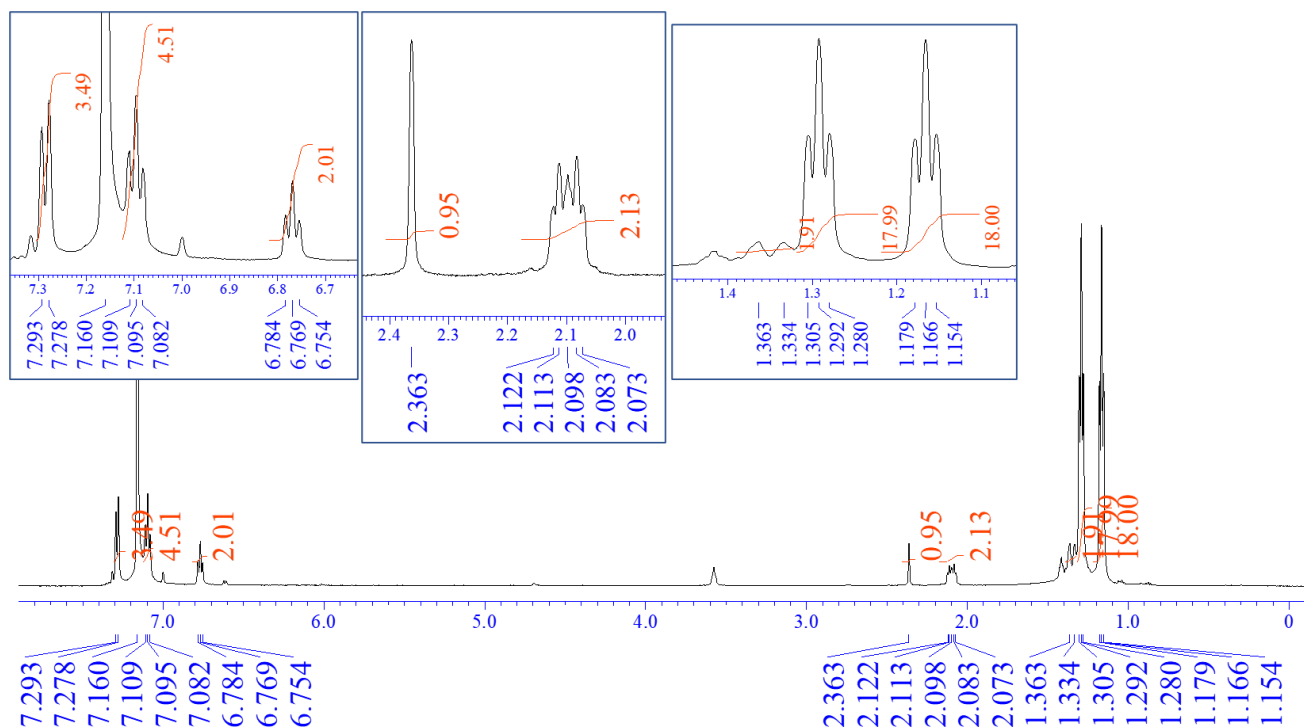

**Figure S23.** <sup>1</sup>H NMR spectrum of **8** (C<sub>6</sub>D<sub>6</sub>, 500 MHz).

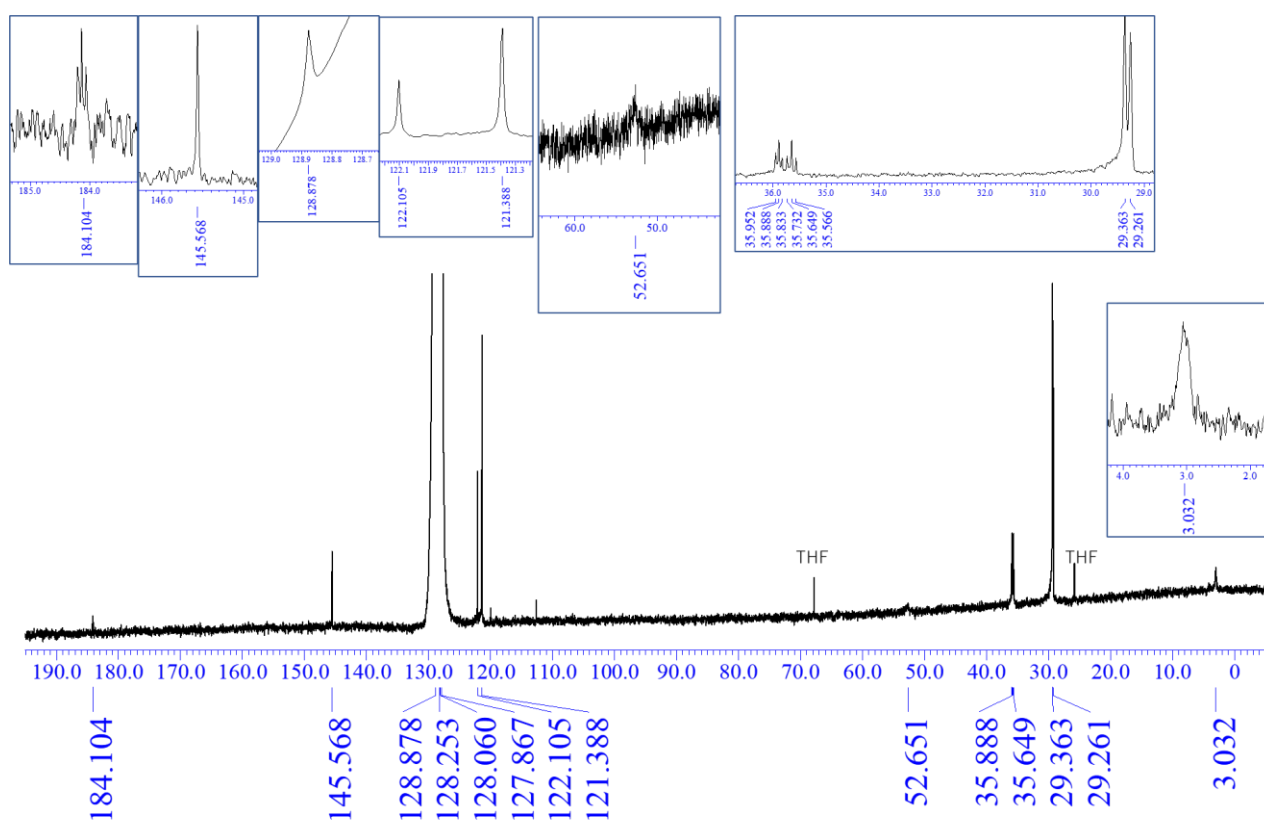

**Figure S24.** <sup>13</sup>C NMR spectrum of **8** (C<sub>6</sub>D<sub>6</sub>, 126 MHz).

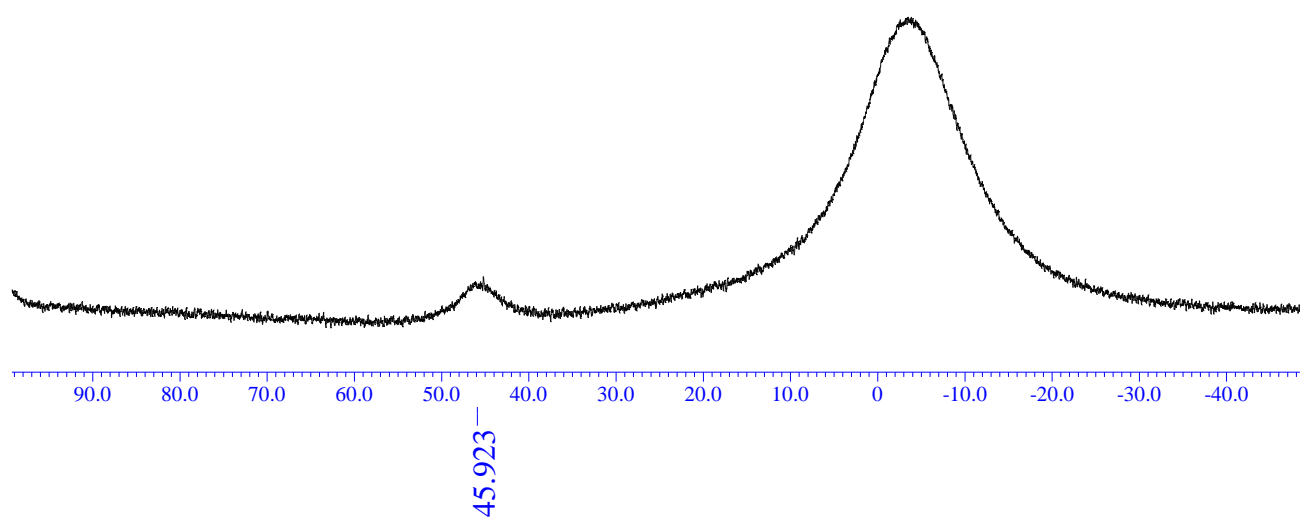

**Figure S25.**  $^{11}\text{B}\{^1\text{H}\}$  NMR spectrum of **8** ( $\text{C}_6\text{D}_6$ , 160 MHz).

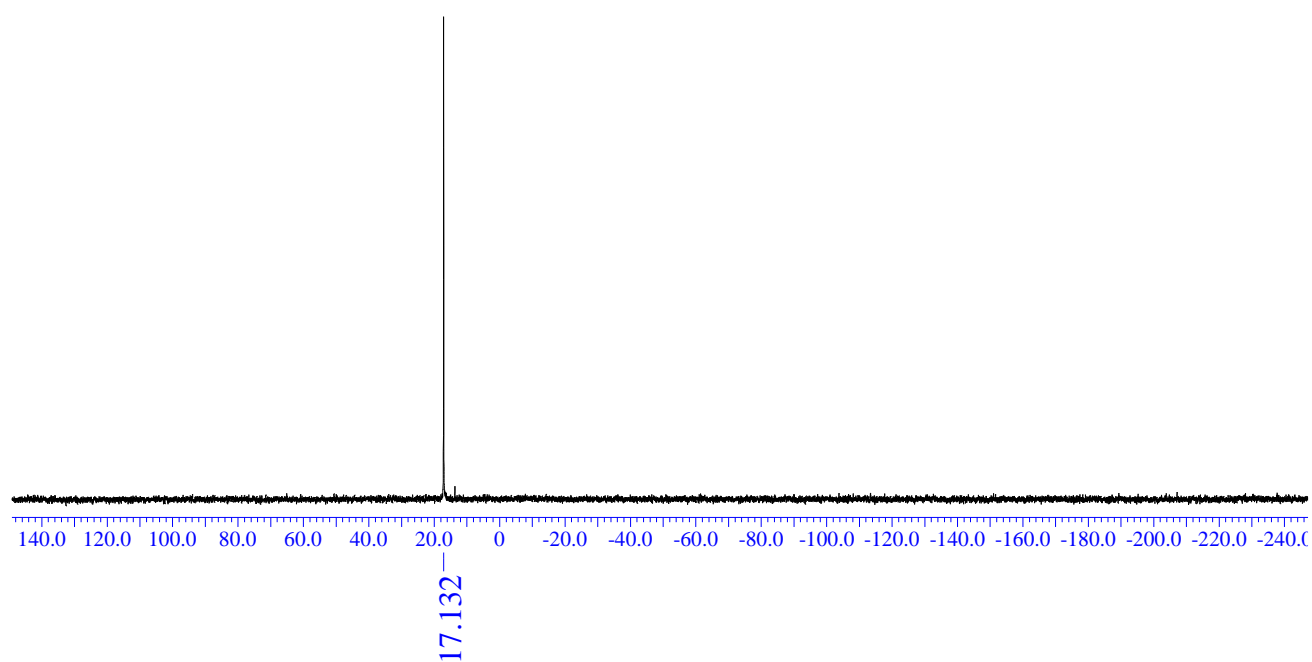

**Figure S26.**  $^{31}\text{P}\{^1\text{H}\}$  NMR spectrum of **8** ( $\text{C}_6\text{D}_6$ , 202 MHz).

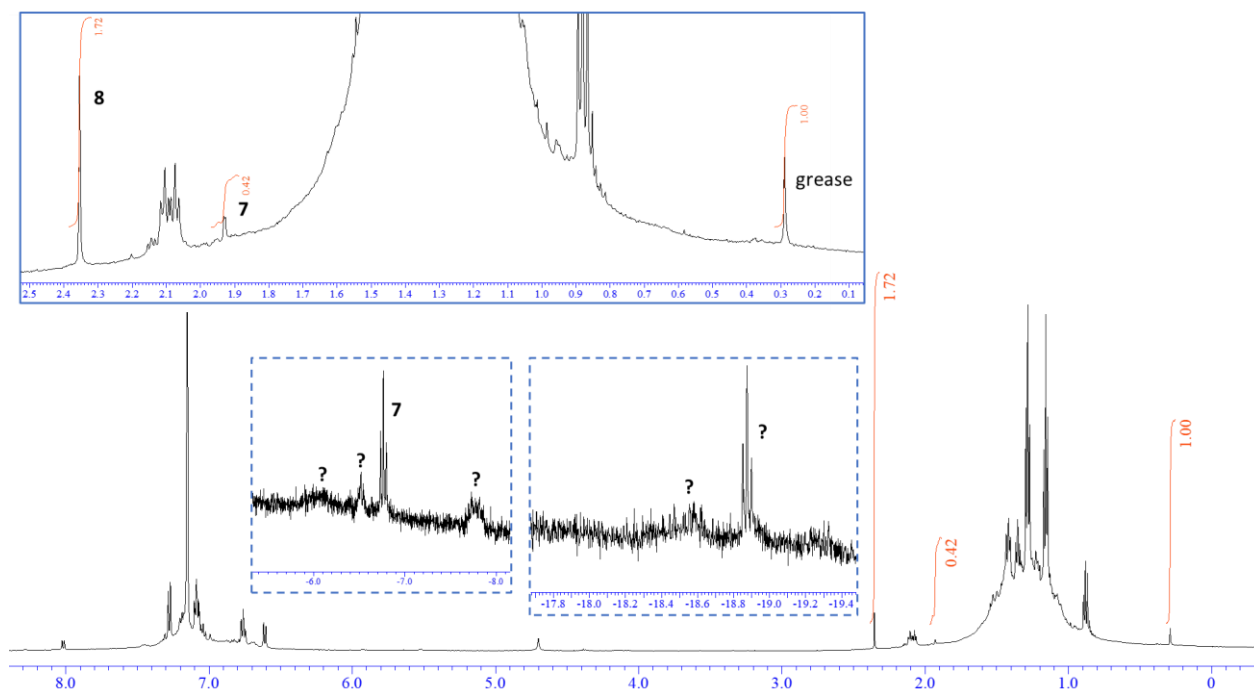

**Figure S27.**  $^1\text{H}$  NMR spectrum after heating complex **7** ( $\text{C}_6\text{D}_6$ , 500 MHz). Hydride region is separately shown in the dashed boxes.

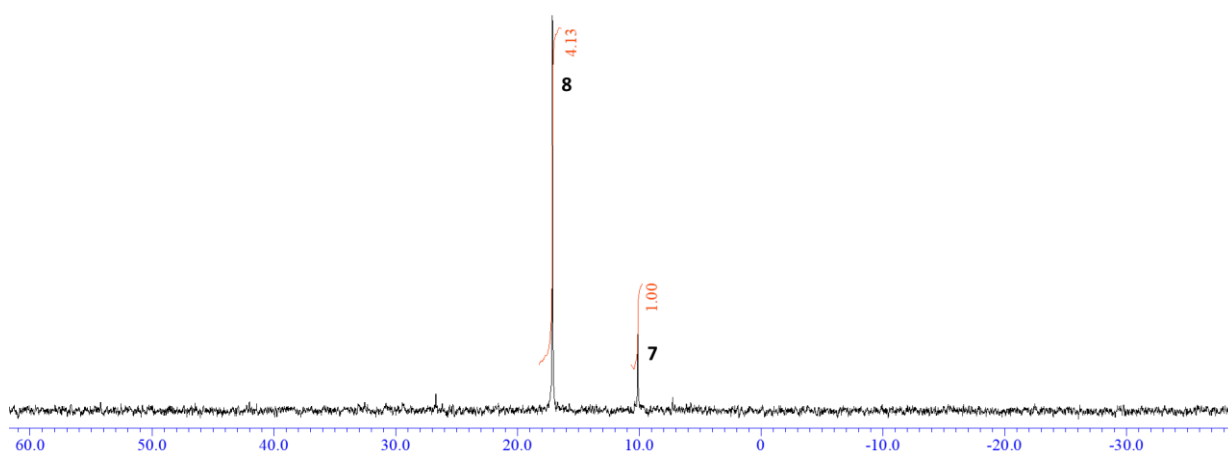

**Figure S28.**  $^{31}\text{P}\{^1\text{H}\}$  NMR spectrum after heating complex **7** ( $\text{C}_6\text{D}_6$ , 202 MHz).

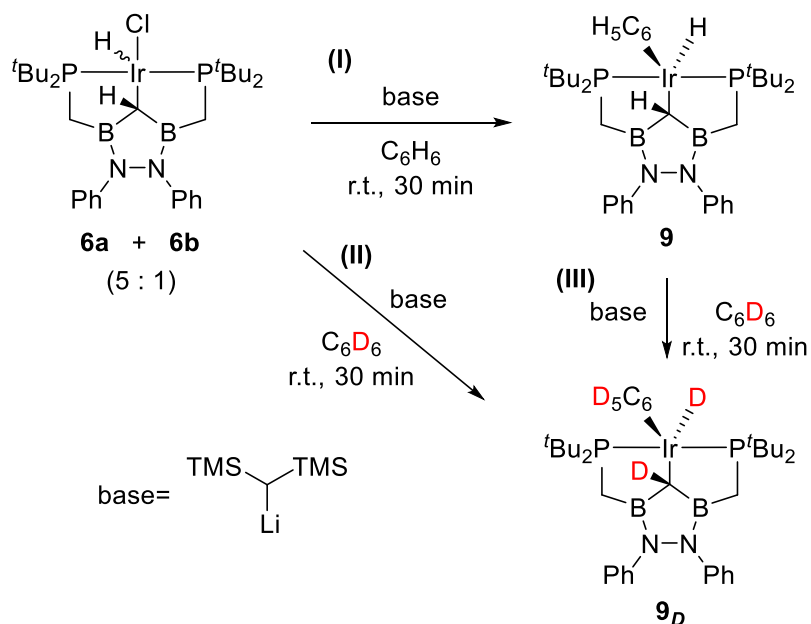

**Scheme S3.** The entire synthetic routes for complexes **9** and **9<sub>D</sub>**.

**9**

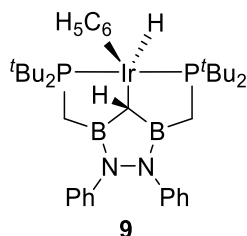

#### [Reaction (I) in NMR scale]

The reaction was conducted in a valved NMR tube under argon atmosphere. To a solution of the mixture of **6a** and **6b** (10.0 mg, 13.1  $\mu\text{mol}$ ) in benzene (0.5 mL), bis(trimethylsilyl)methyl lithium (4.2 mg, 25.2  $\mu\text{mol}$ ) was added. The mixture was settled at room temperature for 30 min. By NMR analyses, generation of compound **9** was confirmed.

#### [Reaction (I) in large scale]

To a solution of the mixture of **6a** and **6b** (30.6 mg, 40.1  $\mu\text{mol}$ ) in benzene (5 mL), bis(trimethylsilyl)methyl lithium (13.4 mg, 80.1  $\mu\text{mol}$ ) was added. The mixture was stirred at room temperature for 30 min. The solution was concentrated to *ca.* 0.5 mL. Complex **9** was recrystallized by the addition of pentane slowly with vapor-diffusion method to afford orange crystals. The obtained crystals were washed with pentane and dried under reduced pressure to afford pure complex **9** (6.0 mg, 19 % yield).

Because complex **9** gradually decomposed in solvents other than C<sub>6</sub>H<sub>6</sub>, NMR spectra could successfully be recorded only in C<sub>6</sub>H<sub>6</sub> (with solvent lock and shimming with <sup>1</sup>H signal of C<sub>6</sub>H<sub>6</sub>).

<sup>1</sup>H NMR (400 MHz, C<sub>6</sub>H<sub>6</sub>) Signals of the aromatic protons were overlapped with the signal of benzene.  $\delta$ : 2.14 (m, 2H), 1.21 (m, 2H), 1.14 (dd,  $J$  = 10.6, 3.2 Hz, 1H), 1.07 (m, 18H), 0.98 (m, 18H), -38.19 (dt,  $J$  = 10.6, 9.5 Hz, 1H); <sup>13</sup>C NMR (126 MHz, C<sub>6</sub>H<sub>6</sub>) Signals of the aromatic carbons cannot be assigned because of the noise from the solvent (C<sub>6</sub>H<sub>6</sub>).  $\delta$ : 65.9 (br, 1C), 36.2 (s, 4C), 29.8 (s, 6C), 29.4 (s, 6C), 4.5 (br, 2C); <sup>11</sup>B{<sup>1</sup>H} NMR (160 MHz, C<sub>6</sub>H<sub>6</sub>)  $\delta$ : 46.9; <sup>31</sup>P{<sup>1</sup>H} NMR (202 MHz, C<sub>6</sub>H<sub>6</sub>)  $\delta$ : 4.7; Elem. Anal. calcd for C<sub>37</sub>H<sub>57</sub>B<sub>2</sub>N<sub>2</sub>P<sub>2</sub>Ir C, 55.16; H, 7.13; N, 3.48; found C, 55.04; H, 7.18; N, 3.48; IR (neat) cm<sup>-1</sup> 2922, 1597, 1565, 1488.

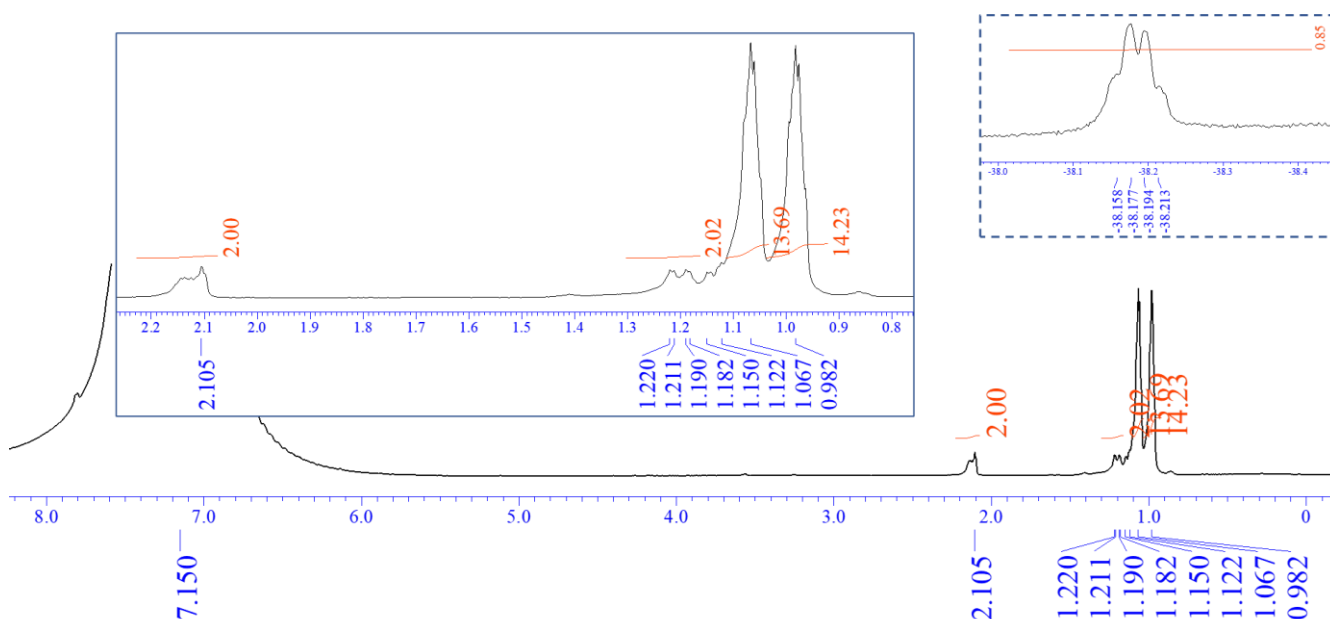

**Figure S29.** <sup>1</sup>H NMR spectrum of **9** (C<sub>6</sub>H<sub>6</sub>, 400 MHz). Hydride region is separately shown in the dashed box.

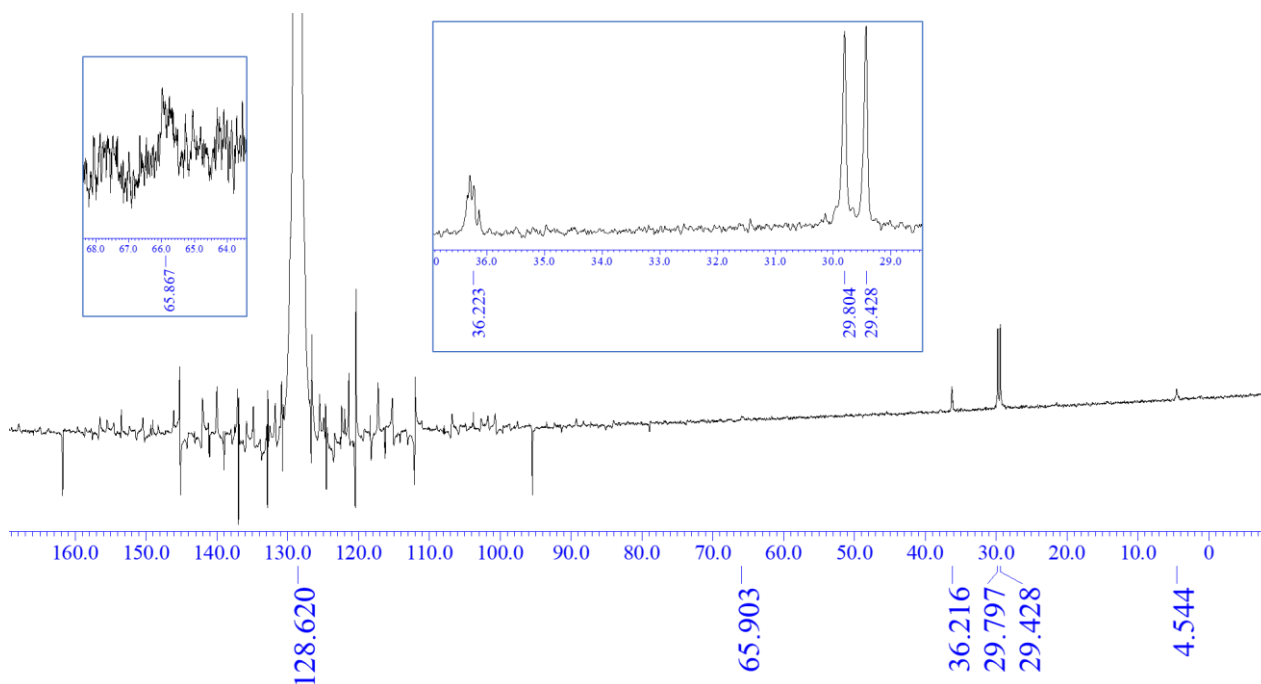

**Figure S30.** <sup>13</sup>C NMR spectrum of **9** (C<sub>6</sub>H<sub>6</sub>, 126 MHz).

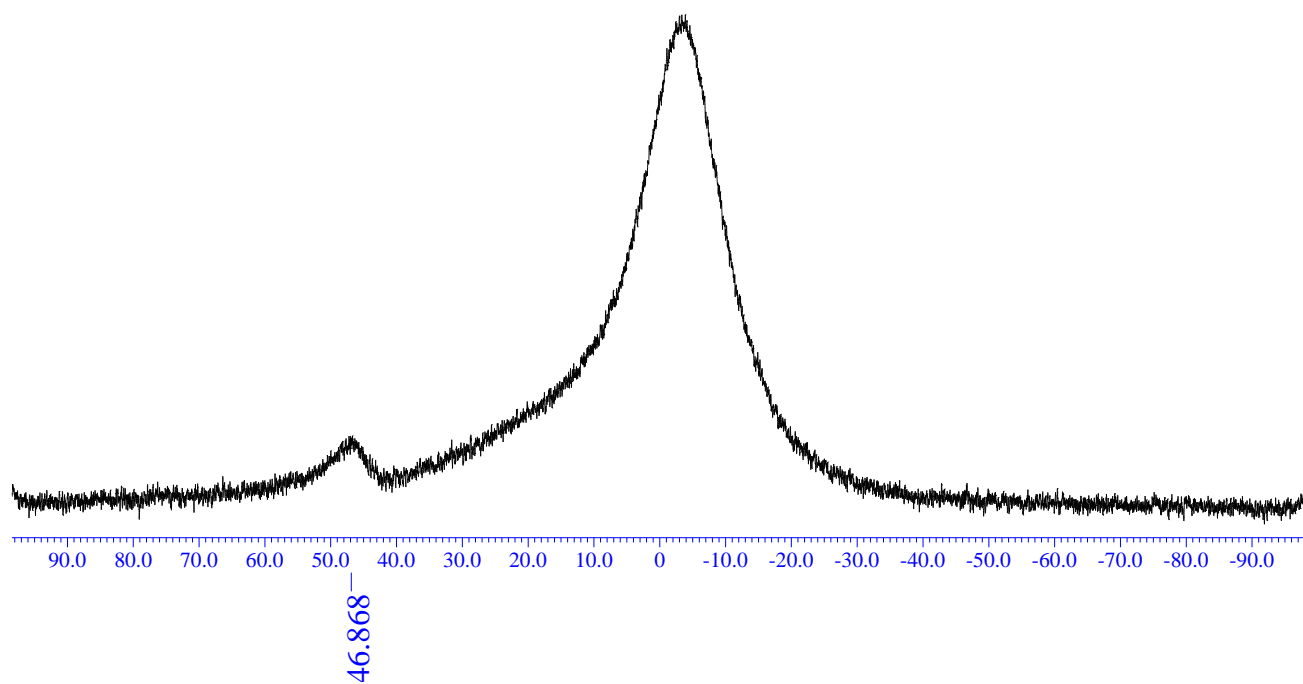

**Figure S31.**  $^{11}\text{B}\{^1\text{H}\}$  NMR spectrum of **9** ( $\text{C}_6\text{H}_6$ , 160 MHz).

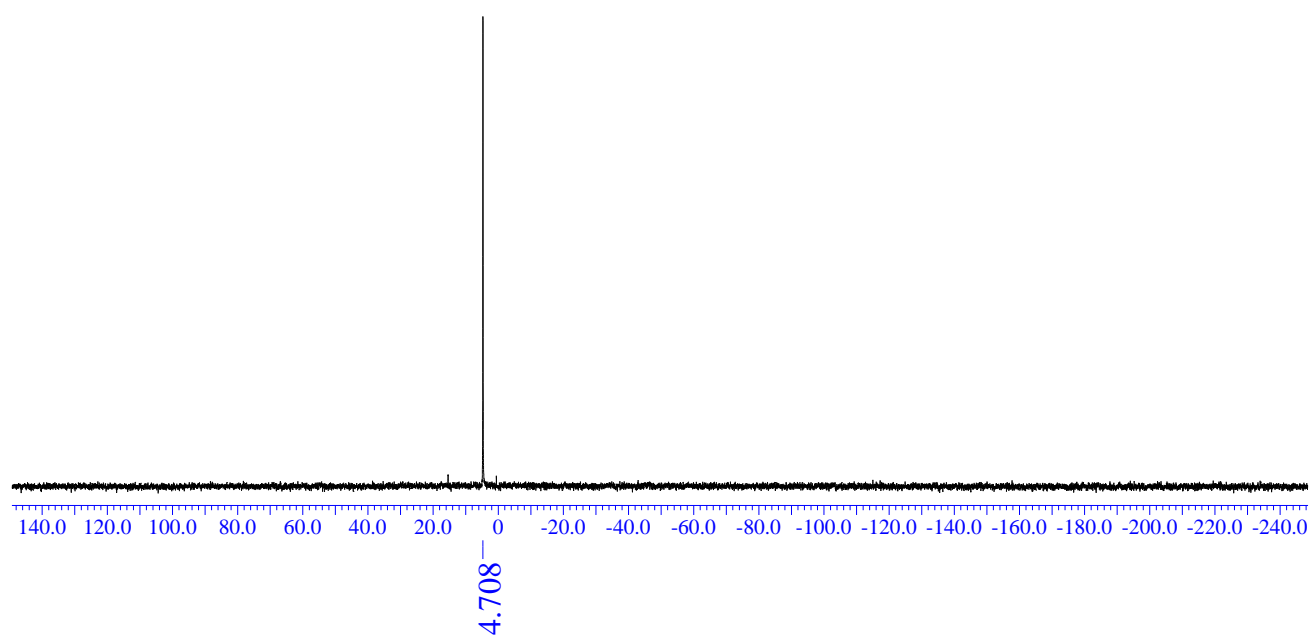

**Figure S32.**  $^{31}\text{P}\{^1\text{H}\}$  NMR spectrum of **9** ( $\text{C}_6\text{H}_6$ , 202 MHz).

**9<sub>D</sub>**

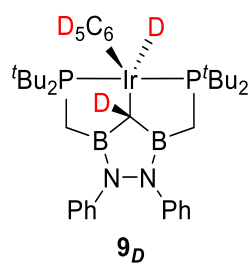

### [Reaction (II)]

The reaction was conducted in an NMR tube. To a solution of the mixture of **6a** and **6b** (5.0 mg, 6.54  $\mu\text{mol}$ ) in benzene- $d_6$  (0.5 mL), bis(trimethylsilyl)methyl lithium (2.2 mg, 13.1  $\mu\text{mol}$ ) was added. The mixture was settled at room temperature for 1.5 h. Generation of compound **9<sub>D</sub>** was confirmed by  $^1\text{H}$ ,  $^2\text{H}$  and  $^{31}\text{P}$  NMR.

### [Reaction (III)]

A small portion of crystals of complex **9** was dissolved in benzene- $d_6$  (0.5 mL) at room temperature. After 30 min, complete conversion of complex **9** to complex **9<sub>D</sub>** was confirmed by  $^{31}\text{P}$  and  $^1\text{H}$  NMR analyses.

$^1\text{H}$  NMR (500 MHz,  $\text{C}_6\text{D}_6$ )  $\delta$ : 7.33 (d,  $J = 7.4$  Hz, 4H), 7.13 (t,  $J = 7.4$  Hz, 4H), 6.79 (t,  $J = 7.4$  Hz, 2H), 2.13 (dvt,  $J = 14.8, 4.6$  Hz, 2H), 1.21 (dvt,  $J = 14.8, 4.2$  Hz, 2H), 1.08 (vt,  $J = 6.4$  Hz, 18H), 0.98 (vt,  $J = 6.4$  Hz, 18H);  $^{13}\text{C}$  NMR (126 MHz,  $\text{C}_6\text{D}_6$ )  $\delta$ : 146.0 (s, 2C), 128.9 (s, 4C), 121.9 (s, 2C), 121.3 (s, 4C), 66.6 (br, the signal is quite hard to see because of the coupling with two boron, one deuterium and two phosphorous nuclei), 36.2 (s, 4C), 29.8 (s, 6C), 29.3 (s, 6C), 4.5 (br, 2C);  $^{11}\text{B}\{^1\text{H}\}$  NMR (160 MHz,  $\text{C}_6\text{D}_6$ )  $\delta$ : 47.9;  $^{31}\text{P}\{^1\text{H}\}$  NMR (202 MHz,  $\text{C}_6\text{D}_6$ )  $\delta$ : 4.9;  $^2\text{H}$  NMR (61 MHz,  $\text{C}_6\text{D}_6$ )  $\delta$ : 1.30, -37.5; IR (neat)  $\text{cm}^{-1}$  2895, 1592, 1552, 1468.

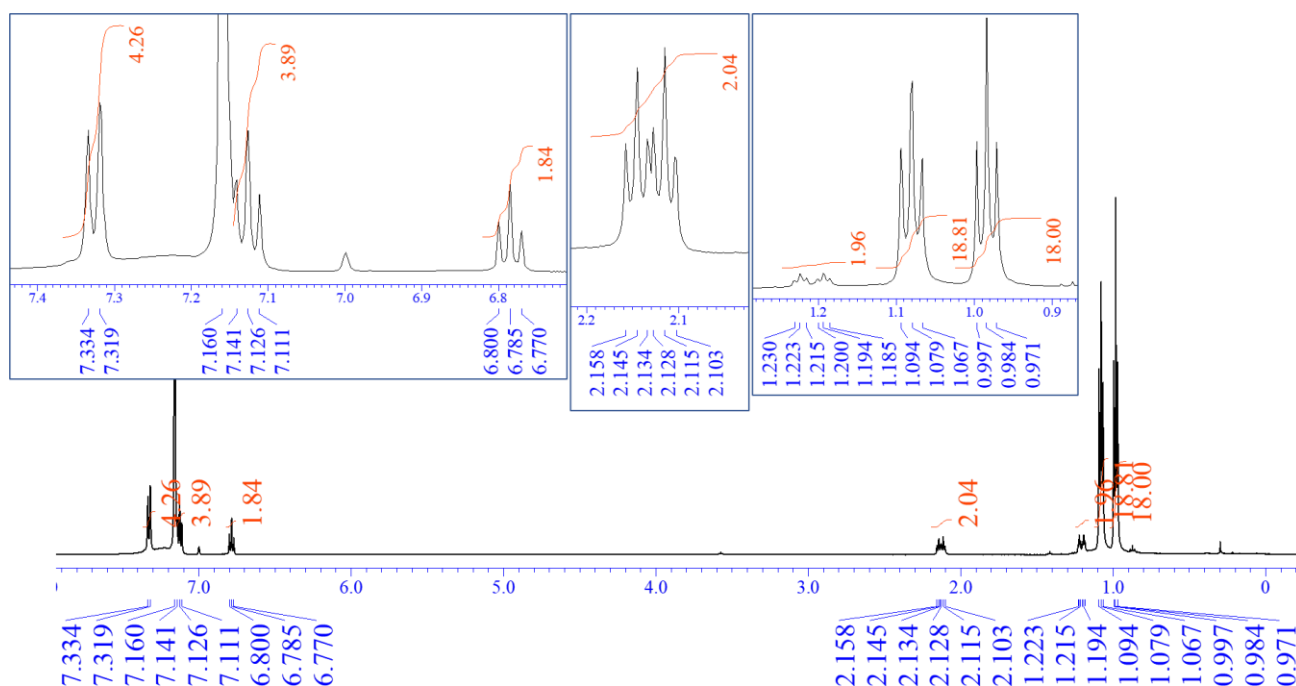

**Figure S33.**  $^1\text{H}$  NMR spectrum of **9<sub>D</sub>** ( $\text{C}_6\text{D}_6$ , 500 MHz).

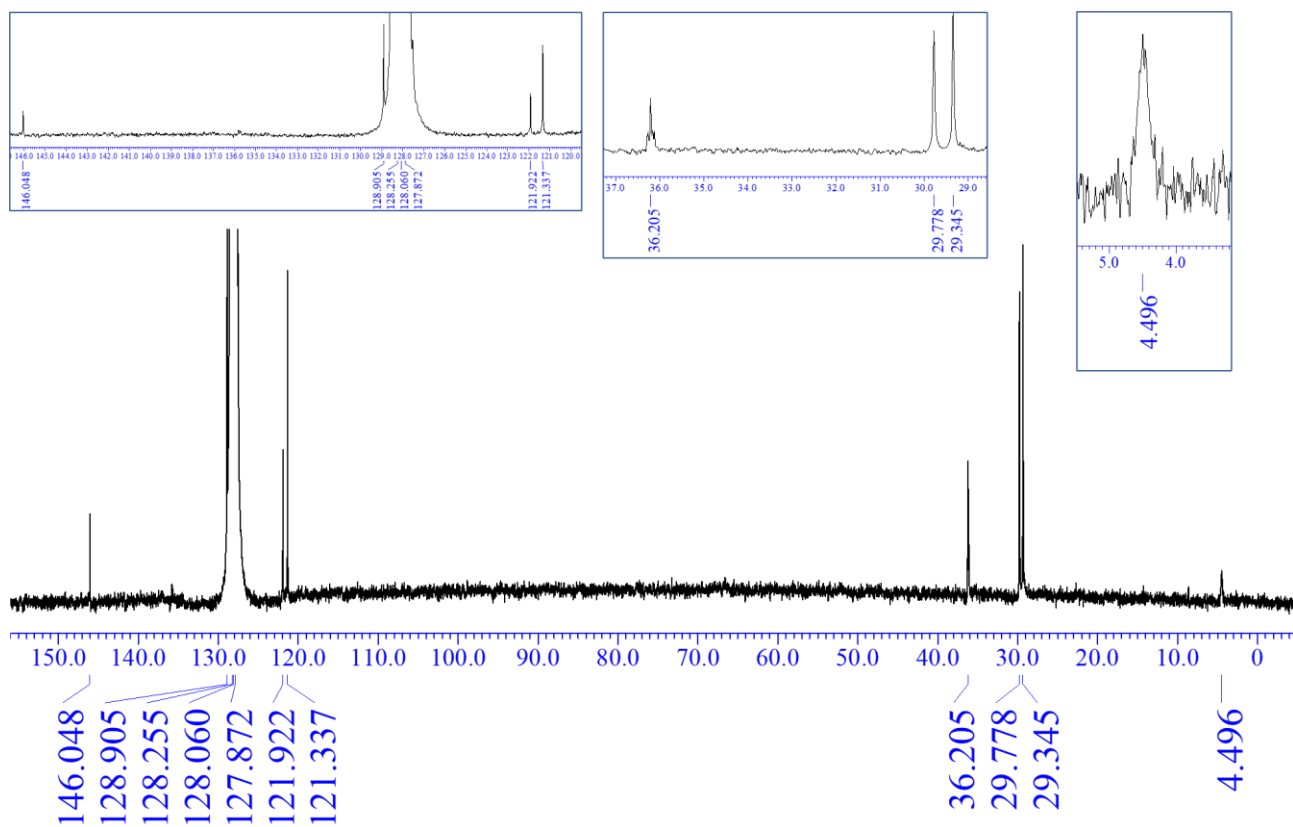

**Figure S34.** <sup>13</sup>C NMR spectrum of **9<sub>D</sub>** (C<sub>6</sub>D<sub>6</sub>, 126 MHz).

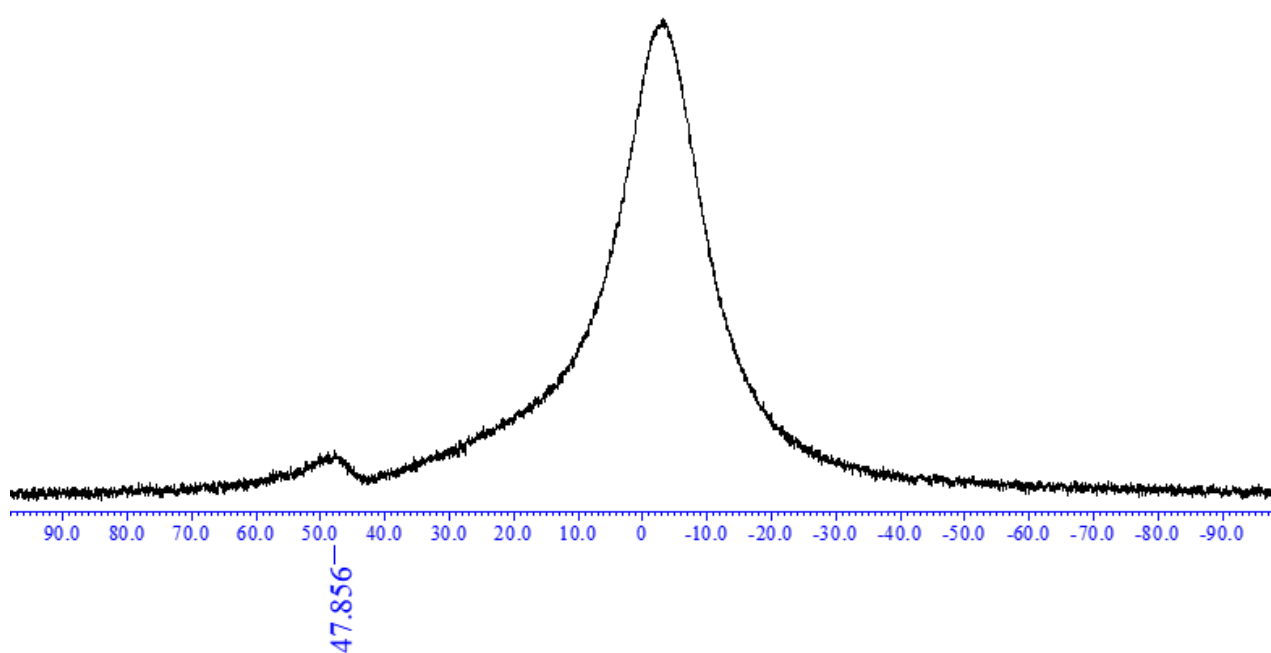

**Figure S35.** <sup>11</sup>B{<sup>1</sup>H} NMR spectrum of **9<sub>D</sub>** (C<sub>6</sub>D<sub>6</sub>, 160 MHz).

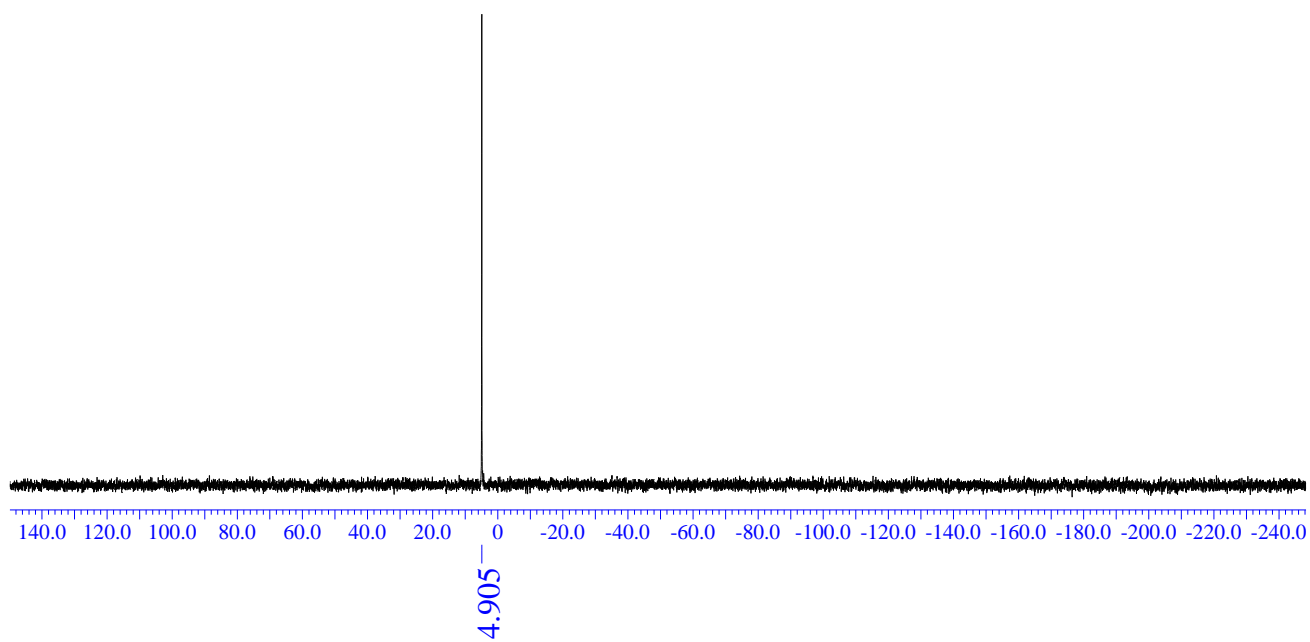

**Figure S36.**  $^{31}\text{P}\{^1\text{H}\}$  NMR spectrum of **9<sub>D</sub>** ( $\text{C}_6\text{D}_6$ , 202 MHz).

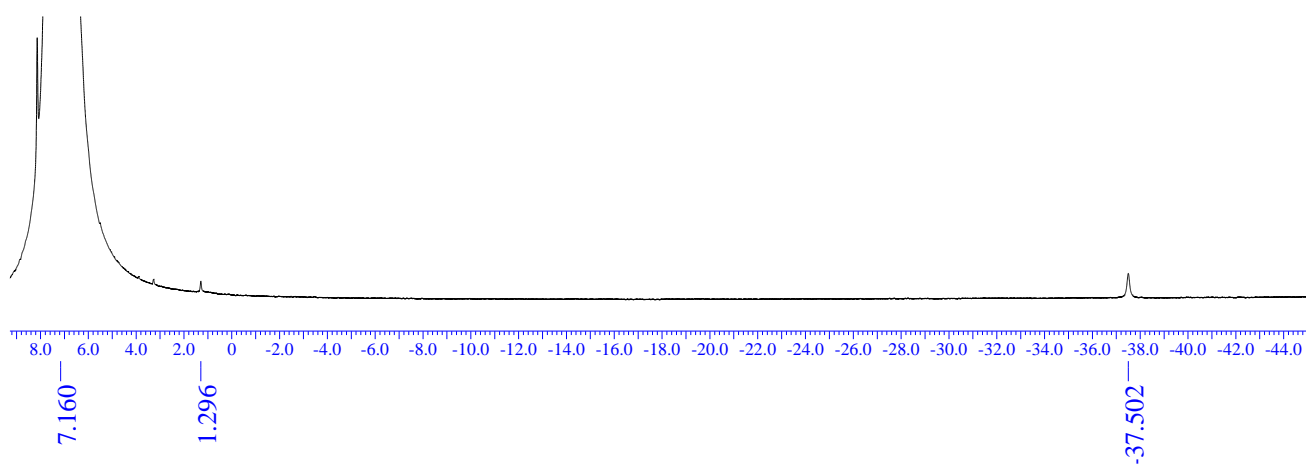

**Figure S37.**  $^2\text{H}$  NMR spectrum of **9<sub>D</sub>** ( $\text{C}_6\text{D}_6$ , 61 MHz).

### I-III. Dehydrogenation of Cyclooctane

To a 10-mL autoclave, cyclooctane (1.25 mL) and 3,3-dimethylbut-1-ene (*tert*-butylethylene, 1.20 mL), then, 5:1 mixture of complexes **6a** and **6b** (2.3 mg, 3.0  $\mu$ mol), and additive (30  $\mu$ mol) were added. The autoclave was filled with argon and heated to a certain temperature. After 6 hours, the reaction mixture was analyzed by GC with an internal standard (dodecane). TON was calculated by dividing the obtained amount of cyclooctene with the amount of catalyst used.

**Table S1.** Dehydrogenation of cyclooctane with the synthesized complexes.

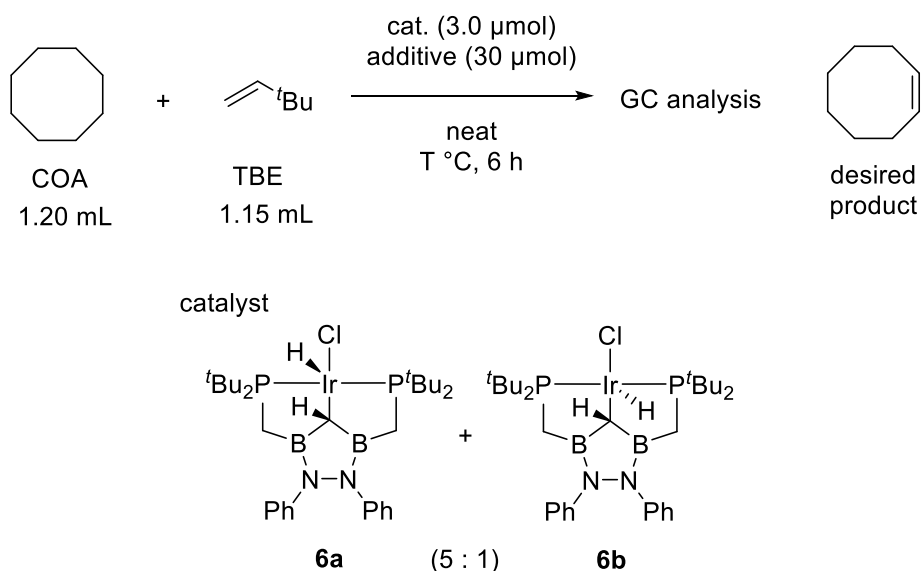

| entry | additive                   | temp. (°C) | TON  |
|-------|----------------------------|------------|------|
| 1     | NaO <sup><i>t</i></sup> Bu | 200        | 1.9  |
| 2     | NaO <sup><i>t</i></sup> Bu | 140        | 0.48 |
| 3     | None                       | 140        | 0.45 |

**Results and Discussions:** Initially the mixture of **6a** and **6b** was examined with an assistant base NaO<sup>*t*</sup>Bu (entry 1). TON was low (1.9) and decomposed black iridium powder was precipitated. Under lower temperature (entry 2) and without base (entry 3), TON was still quite low, although decomposed precipitate was not observed. The synthesized PCP-iridium complexes seemed to have only limited activity for transfer dehydrogenation of cycloalkane.

## II. IR Spectra of the Novel Compounds

Compound 3

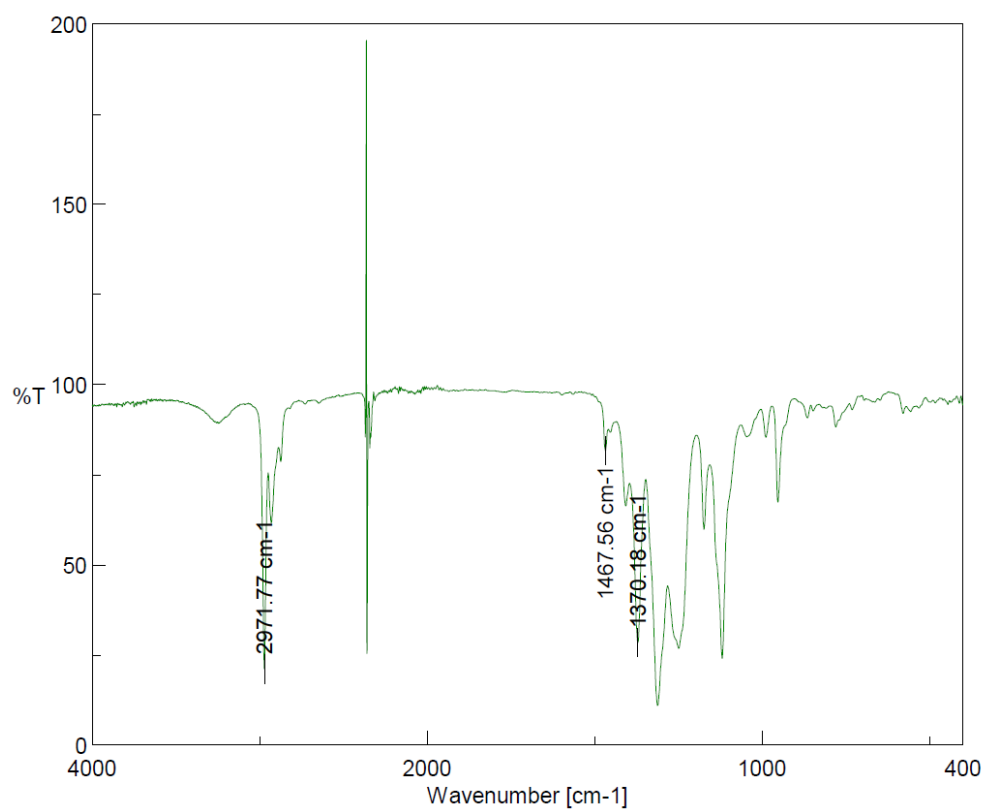

Figure S38. IR spectrum (ATR) for compound 3.

Compound 4

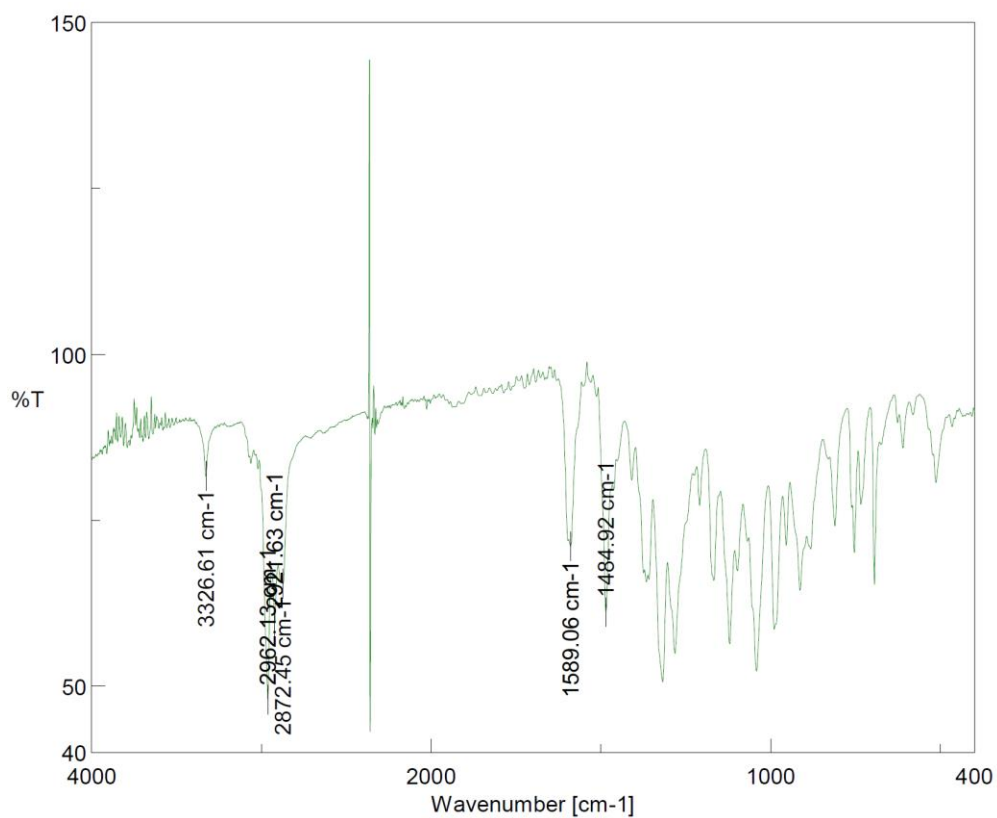

Figure S39. IR spectrum (ATR) for compound 4.

Compound **5**

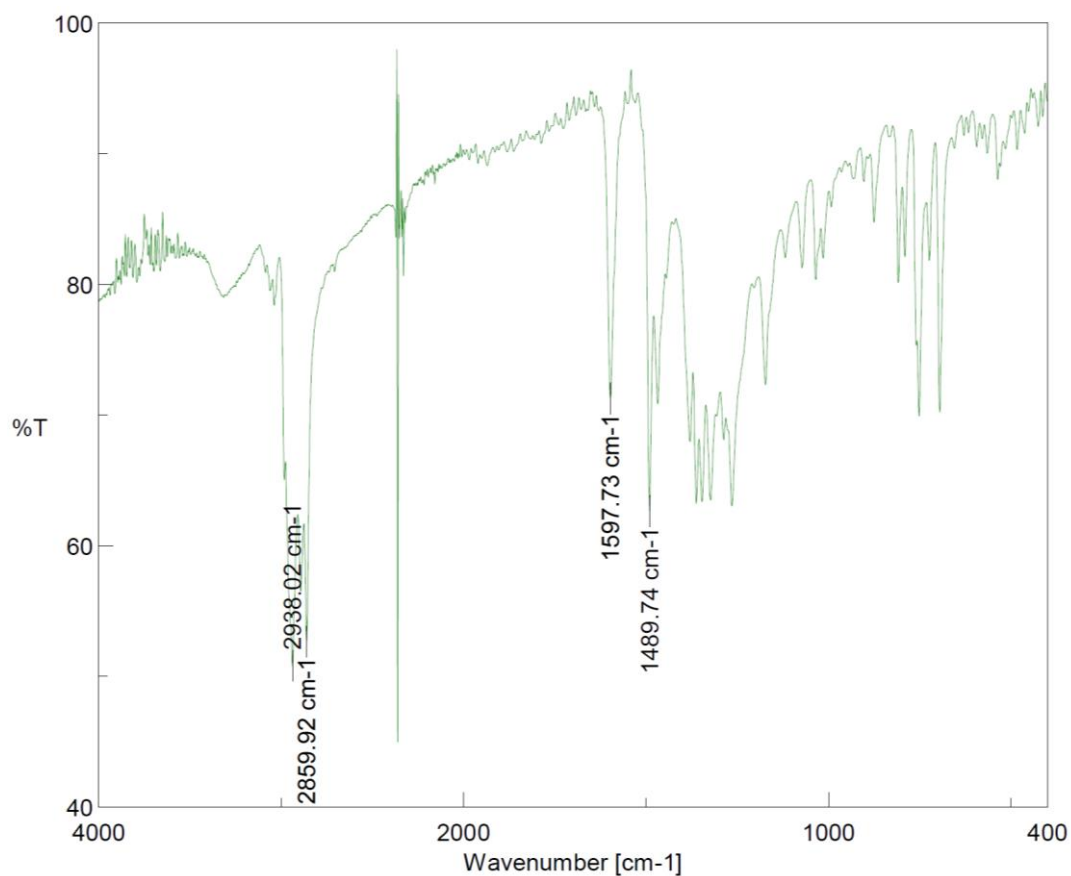

**Figure S40.** IR spectrum (ATR) for compound **5**.

Mixture of **6a** and **6b**

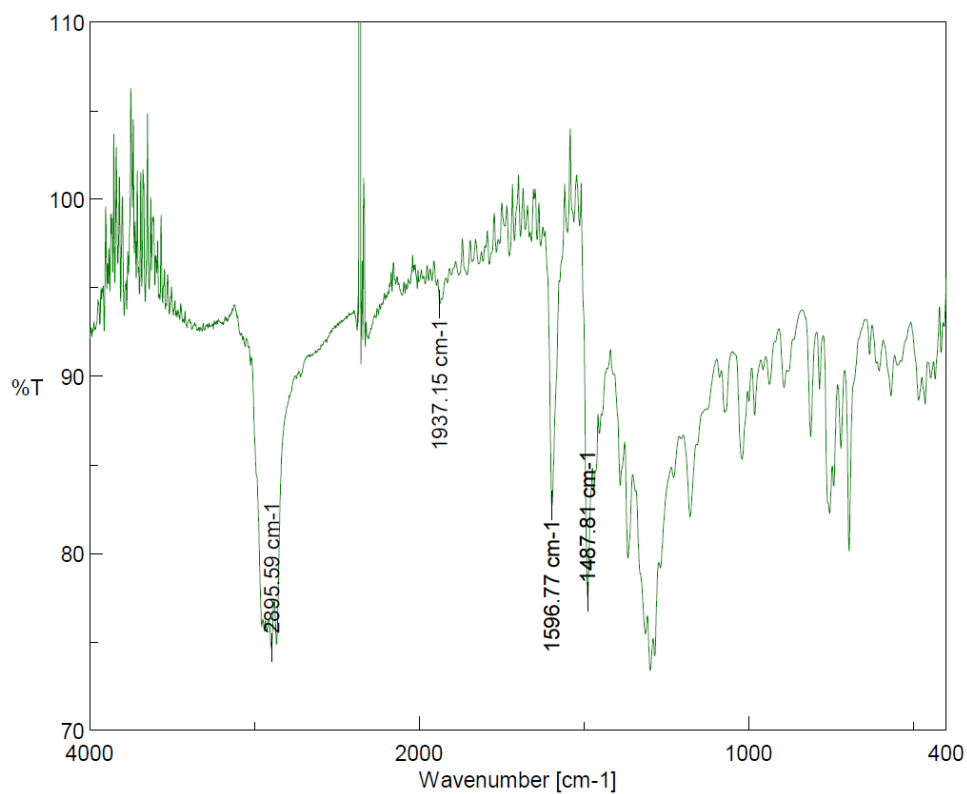

**Figure S41.** IR spectrum (ATR) for mixture of **6a** and **6b** (5:1).

**Compound 7**

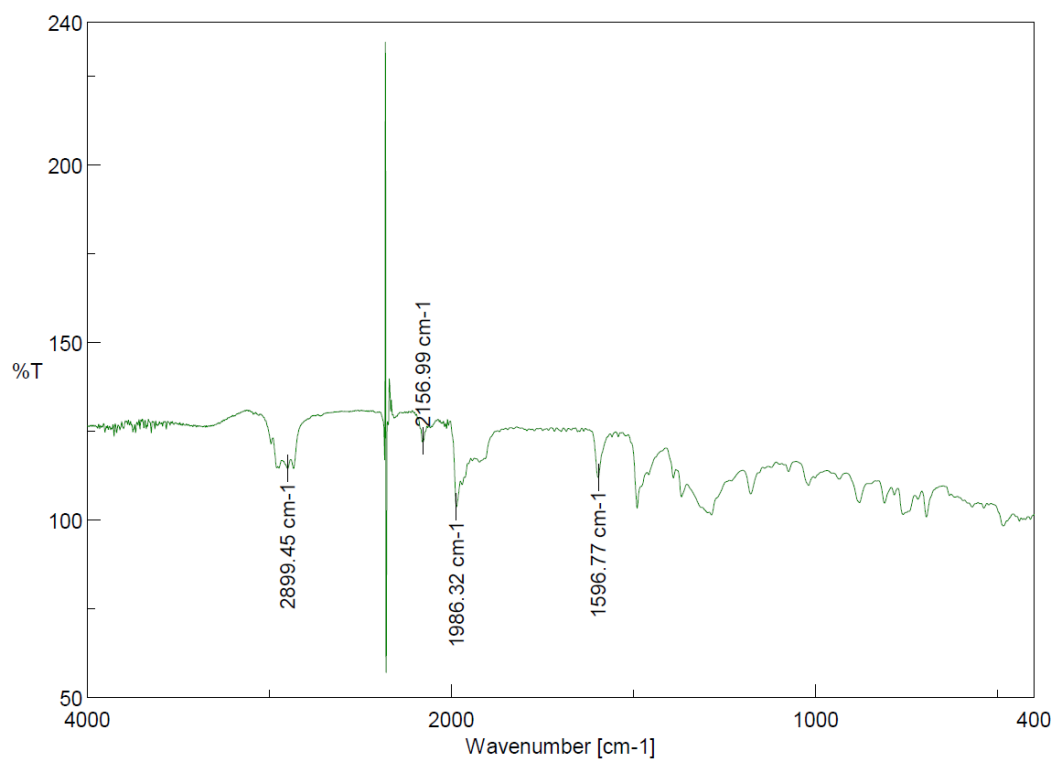

**Figure S42.** IR spectrum (ATR) for compound 7.

**Compound 8**

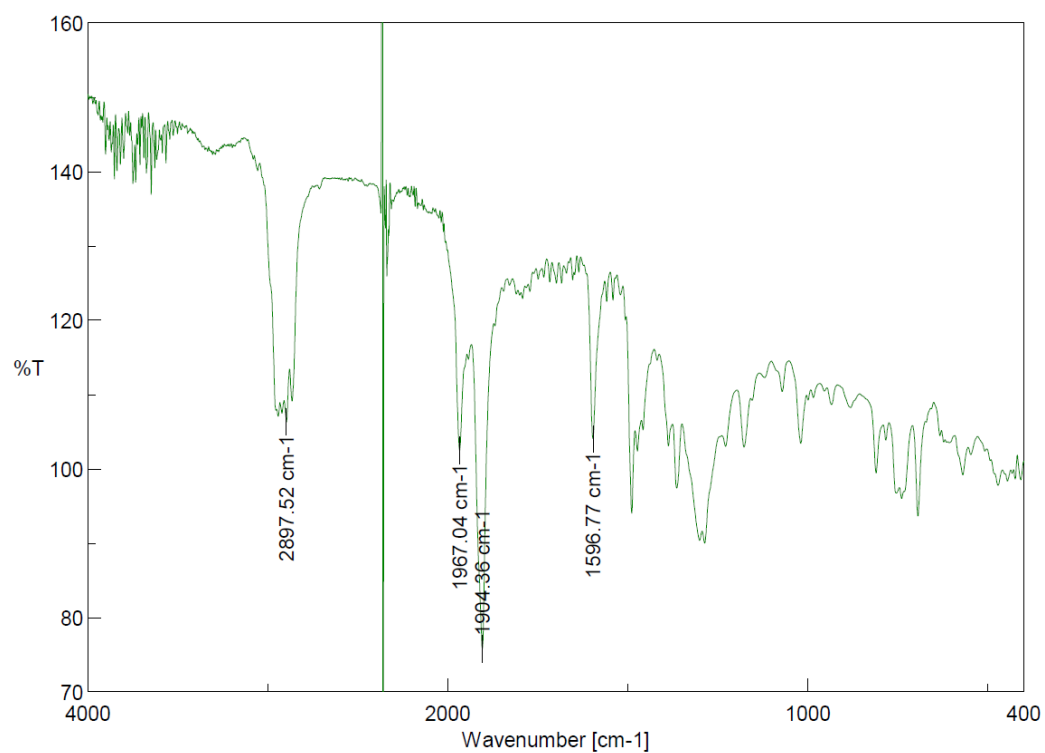

**Figure S43.** IR spectrum (ATR) for compound 8.

Compound **9**

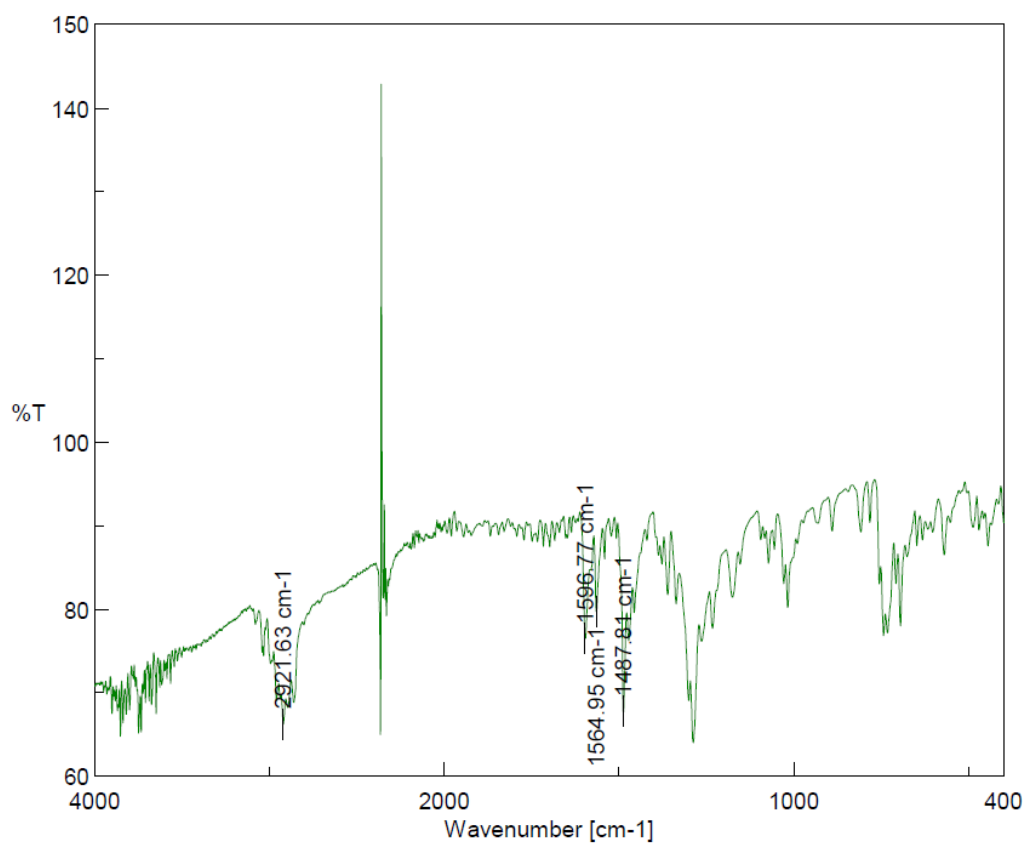

**Figure S44.** IR spectrum (ATR) for compound **9**.

Compound **9<sub>b</sub>**

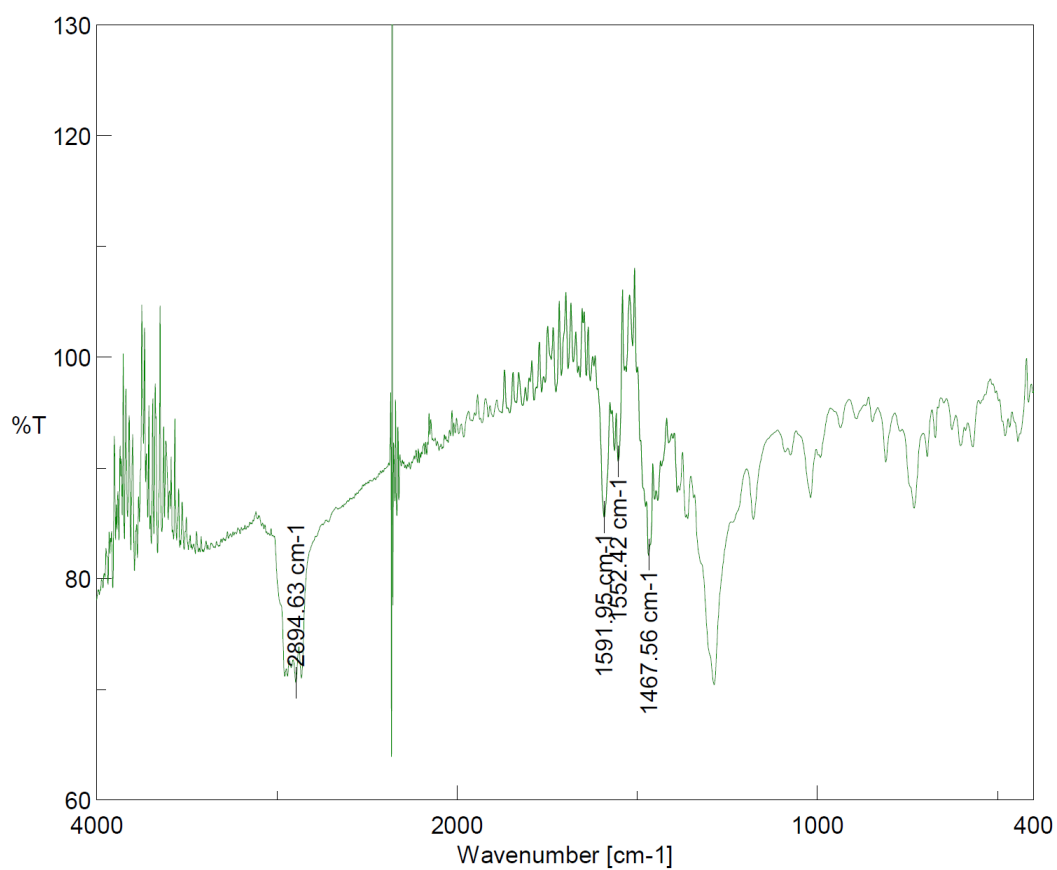

**Figure S45.** IR spectrum (ATR) for compound **9<sub>b</sub>**.

### III. Detail for the X-ray Crystallographic Analyses

#### III-I. Instrumentation

X-ray crystallographic analyses of single crystals were performed on a Rigaku VariMax with Saturn diffractometer. A single crystal was mounted with mineral oil on a loop-type mount and transferred to the goniometer. The radiation was performed with graphite-monochromated Mo K $\alpha$  ( $\lambda = 0.71075 \text{ \AA}$ ) at 50 kV and 24 mA. The structures were solved by the direct method with (SHELXT 2014) and refined by full-matrix least-squares techniques against  $F^2$  (SHELXL 2014). The intensities were corrected for Lorentz and polarization effects. The nonhydrogen atoms were refined anisotropically.

#### III-II. Data for Compounds 4 and 5, Complexes 6b, 7, 8 and 9

##### III-II-I ORTEP Drawing for the Compound 4

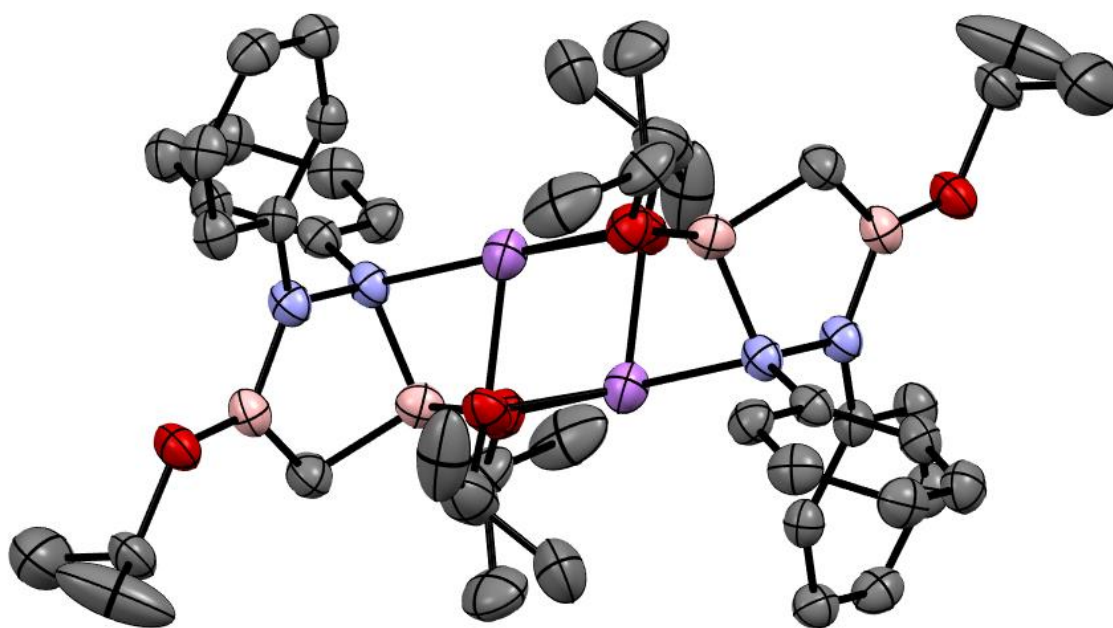

**Figure S46.** X-ray structure of **4**. (thermal ellipsoids are drawn with 50 % probability; hydrogen atoms on carbon atoms are omitted for clarity)

**Table S2.** Crystal data and structure refinement for **4** and **5**.

|                   | <b>4</b>                                                                       | <b>5</b>                                                                     |
|-------------------|--------------------------------------------------------------------------------|------------------------------------------------------------------------------|
| CCDC number       | 2121282                                                                        | 2121283                                                                      |
| Empirical formula | C <sub>22</sub> H <sub>33</sub> B <sub>2</sub> LiN <sub>2</sub> O <sub>3</sub> | C <sub>31</sub> H <sub>52</sub> B <sub>2</sub> N <sub>2</sub> P <sub>2</sub> |

|                                                  |                                  |                                  |
|--------------------------------------------------|----------------------------------|----------------------------------|
| Formula weight                                   | 402.06                           | 532.27                           |
| Temperature (K)                                  | 93                               | 93                               |
| Wavelength (Å)                                   | 0.71073                          | 0.71075                          |
| Crystal system                                   | monoclinic                       | triclinic                        |
| Space group                                      | $P2_1/c$                         | $P\bar{1}$                       |
| Unit cell dimensions                             | a (Å)                            | 10.3563(8)                       |
|                                                  | b (Å)                            | 21.8893(14)                      |
|                                                  | c (Å)                            | 10.3352(8)                       |
|                                                  | $\alpha$ (°)                     | 90                               |
|                                                  | $\beta$ (°)                      | 101.339(7)                       |
|                                                  | $\gamma$ (°)                     | 90                               |
| Volume (Å <sup>3</sup> )                         | 2308.3(3)                        | 1664.0(16)                       |
| Z                                                | 4                                | 2                                |
| Density (calculated) (g/m <sup>3</sup> )         | 1.157                            | 1.062                            |
| Absorption coefficient (mm <sup>-1</sup> )       | 0.074                            | 0.151                            |
| $F(000)$                                         | 864                              | 576                              |
| Theta (max)                                      | 28.886                           | 24.998                           |
| Index ranges                                     | $-13 \leq h \leq 13$             | $-11 \leq h \leq 13$             |
|                                                  | $-29 \leq k \leq 29$             | $-15 \leq k \leq 15$             |
|                                                  | $-11 \leq l \leq 13$             | $-16 \leq l \leq 15$             |
| Reflections collected                            | 33618                            | 11025                            |
| Independent reflections [R(int)]                 | 5583 [R(int) = 0.1452]           | 5716 [R(int) = 0.0719]           |
| Data Completeness (%)                            | 0.922                            | 0.977                            |
| Absorption correction                            | 5583                             | 5716                             |
| Refinement method                                | Multi-scan                       | Multi-scan                       |
| Data / restraints / parameters                   | 5583 / 0 / 277                   | 5716 / 0 / 346                   |
| Goodness-of-fit on $F^2$                         | 1.038                            | 1.045                            |
| Final R indices [ $I > 2\sigma(I)$ ]             | $R_1 = 0.1644$ , $wR_2 = 0.3323$ | $R_1 = 0.1193$ , $wR_2 = 0.1698$ |
| R indices (all data)                             | $R_1 = 0.1169$ , $wR_2 = 0.3008$ | $R_1 = 0.0737$ , $wR_2 = 0.1401$ |
| Largest diff. peak and hole (e.Å <sup>-3</sup> ) | 1.365 / -0.409                   | 0.348 / -0.366                   |

**Table S3.** Crystal data and structure refinement for **6b** and **7**.

|                   | <b>6b</b>                                                                        | <b>7</b>                                                                          |
|-------------------|----------------------------------------------------------------------------------|-----------------------------------------------------------------------------------|
| CCDC number       | 2121284                                                                          | 2121285                                                                           |
| Empirical formula | C <sub>31</sub> H <sub>52</sub> B <sub>2</sub> ClIrN <sub>2</sub> P <sub>2</sub> | C <sub>32</sub> H <sub>52</sub> B <sub>2</sub> ClIrN <sub>2</sub> OP <sub>2</sub> |
| Formula weight    | 763.95                                                                           | 791.96                                                                            |
| Temperature (K)   | 93                                                                               | 93                                                                                |
| Wavelength (Å)    | 0.71073                                                                          | 0.71073                                                                           |
| Crystal system    | monoclinic                                                                       | monoclinic                                                                        |
| Space group       | $P2_1/n$                                                                         | $P2_1/n$                                                                          |

|                                                  |              |                                                                 |                                                                 |
|--------------------------------------------------|--------------|-----------------------------------------------------------------|-----------------------------------------------------------------|
| Unit cell dimensions                             | a (Å)        | 12.1553(3)                                                      | 12.0281(3)                                                      |
|                                                  | b (Å)        | 18.4045(4)                                                      | 19.0554(4)                                                      |
|                                                  | c (Å)        | 15.9578(4)                                                      | 16.3403(4)                                                      |
|                                                  | $\alpha$ (°) | 90                                                              | 90                                                              |
|                                                  | $\beta$ (°)  | 111.724(3)                                                      | 111.042(3)                                                      |
|                                                  | $\gamma$ (°) | 90                                                              | 90                                                              |
| Volume (Å <sup>3</sup> )                         |              | 3316.41(15)                                                     | 3495.46(16)                                                     |
| Z                                                |              | 4                                                               | 4                                                               |
| Density (calculated) (g/m <sup>3</sup> )         |              | 1.530                                                           | 1.505                                                           |
| Absorption coefficient (mm <sup>-1</sup> )       |              | 4.226                                                           | 4.015                                                           |
| <i>F</i> (000)                                   |              | 1544                                                            | 1600                                                            |
| Theta (max)                                      |              | 28.753                                                          | 28.750                                                          |
| Index ranges                                     |              | -16 ≤ <i>h</i> ≤ 15                                             | -16 ≤ <i>h</i> ≤ 15                                             |
|                                                  |              | -18 ≤ <i>k</i> ≤ 24                                             | -22 ≤ <i>k</i> ≤ 25                                             |
|                                                  |              | -20 ≤ <i>l</i> ≤ 21                                             | -21 ≤ <i>l</i> ≤ 16                                             |
| Reflections collected                            |              | 28485                                                           | 32953                                                           |
| Independent reflections [R(int)]                 |              | 7754 [R(int) = 0.0318]                                          | 8159 [R(int) = 0.0289]                                          |
| Data Completeness (%)                            |              | 0.900                                                           | 0.900                                                           |
| Absorption correction                            |              | 7754                                                            | 8159                                                            |
| Refinement method                                |              | Multi-scan                                                      | Multi-scan                                                      |
| Data / restraints / parameters                   |              | 7754 / 0 / 368                                                  | 8159 / 1 / 386                                                  |
| Goodness-of-fit on <i>F</i> <sup>2</sup>         |              | 1.040                                                           | 1.049                                                           |
| Final R indices [ <i>I</i> > 2σ( <i>I</i> )]     |              | <i>R</i> <sub>1</sub> = 0.0255, <i>wR</i> <sub>2</sub> = 0.0506 | <i>R</i> <sub>1</sub> = 0.0390, <i>wR</i> <sub>2</sub> = 0.0903 |
| R indices (all data)                             |              | <i>R</i> <sub>1</sub> = 0.0209, <i>wR</i> <sub>2</sub> = 0.0495 | <i>R</i> <sub>1</sub> = 0.0345, <i>wR</i> <sub>2</sub> = 0.0883 |
| Largest diff. peak and hole (e.Å <sup>-3</sup> ) |              | 1.097 / -0.687                                                  | 4.332 / -2.978                                                  |

**Table S4.** Crystal data and structure refinement for **8** and **9**.

|                      |              | <b>8</b>                                                                        | <b>9</b>                                                                       |
|----------------------|--------------|---------------------------------------------------------------------------------|--------------------------------------------------------------------------------|
| CCDC number          |              | 2121286                                                                         | 2121287                                                                        |
| Empirical formula    |              | C <sub>32</sub> H <sub>51</sub> B <sub>2</sub> IrN <sub>2</sub> OP <sub>2</sub> | C <sub>37</sub> H <sub>57</sub> B <sub>2</sub> IrN <sub>2</sub> P <sub>2</sub> |
| Formula weight       |              | 755.50                                                                          | 805.60                                                                         |
| Temperature (K)      |              | 93                                                                              | 93                                                                             |
| Wavelength (Å)       |              | 0.71073                                                                         | 0.71073                                                                        |
| Crystal system       |              | monoclinic                                                                      | monoclinic                                                                     |
| Space group          |              | <i>P</i> 2 <sub>1</sub> / <i>n</i>                                              | <i>P</i> 2 <sub>1</sub> / <i>c</i>                                             |
| Unit cell dimensions | a (Å)        | 12.1072(2)                                                                      | 12.0351(3)                                                                     |
|                      | b (Å)        | 18.3581(3)                                                                      | 14.6757(4)                                                                     |
|                      | c (Å)        | 16.2005(3)                                                                      | 20.6311(6)                                                                     |
|                      | $\alpha$ (°) | 90                                                                              | 90                                                                             |
|                      | $\beta$ (°)  | 111.723(2)                                                                      | 92.120(3)                                                                      |

|                                                  |              |                                                                 |                                                                 |
|--------------------------------------------------|--------------|-----------------------------------------------------------------|-----------------------------------------------------------------|
|                                                  | $\gamma$ (°) | 90                                                              | 90                                                              |
| Volume (Å <sup>3</sup> )                         |              | 3345.09(11)                                                     | 3641.44(17)                                                     |
| Z                                                |              | 4                                                               | 4                                                               |
| Density (calculated) (g/m <sup>3</sup> )         |              | 1.500                                                           | 1.469                                                           |
| Absorption coefficient (mm <sup>-1</sup> )       |              | 4.114                                                           | 3.782                                                           |
| <i>F</i> (000)                                   |              | 1528                                                            | 1640                                                            |
| Theta (max)                                      |              | 28.632                                                          | 25.000                                                          |
| Index ranges                                     |              | -15 ≤ <i>h</i> ≤ 16                                             | -14 ≤ <i>h</i> ≤ 14                                             |
|                                                  |              | -24 ≤ <i>k</i> ≤ 24                                             | -17 ≤ <i>k</i> ≤ 17                                             |
|                                                  |              | -20 ≤ <i>l</i> ≤ 21                                             | -23 ≤ <i>l</i> ≤ 24                                             |
| Reflections collected                            |              | 25796                                                           | 30236                                                           |
| Independent reflections [R(int)]                 |              | 7678 [R(int) = 0.0301]                                          | 6418 [R(int) = 0.0761]                                          |
| Data Completeness (%)                            |              | 0.895                                                           | 0.999                                                           |
| Absorption correction                            |              | 7678                                                            | 6418                                                            |
| Refinement method                                |              | Multi-scan                                                      | Multi-scan                                                      |
| Data / restraints / parameters                   |              | 7678 / 0 / 373                                                  | 6418 / 6 / 414                                                  |
| Goodness-of-fit on <i>F</i> <sup>2</sup>         |              | 1.036                                                           | 1.097                                                           |
| Final R indices [ <i>I</i> > 2σ( <i>I</i> )]     |              | <i>R</i> <sub>1</sub> = 0.0292, <i>wR</i> <sub>2</sub> = 0.0532 | <i>R</i> <sub>1</sub> = 0.0397, <i>wR</i> <sub>2</sub> = 0.0976 |
| R indices (all data)                             |              | <i>R</i> <sub>1</sub> = 0.0233, <i>wR</i> <sub>2</sub> = 0.0516 | <i>R</i> <sub>1</sub> = 0.0371, <i>wR</i> <sub>2</sub> = 0.0964 |
| Largest diff. peak and hole (e.Å <sup>-3</sup> ) |              | 1.271 / -0.981                                                  | 3.339 / -2.716                                                  |

---

## IV. Methods and Discussions for Theoretical Calculations

DFT calculations were performed using the Gaussian 09 Program, revision C.01.<sup>6</sup> All geometry optimizations followed by frequency calculations were performed using M06 functional and SDD basis set for iridium and 6-31G\* basis set for other elements with SMD solvation model (benzene). NBO analyses were conducted with NBO 6.0. For calculations in section IV-III, Gaussian 16 program,<sup>7</sup> M06 functional with Def2SVP basis sets were employed.

### IV-I. NBO and MO Analysis of Complex **7<sub>Me</sub>**

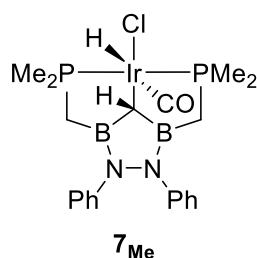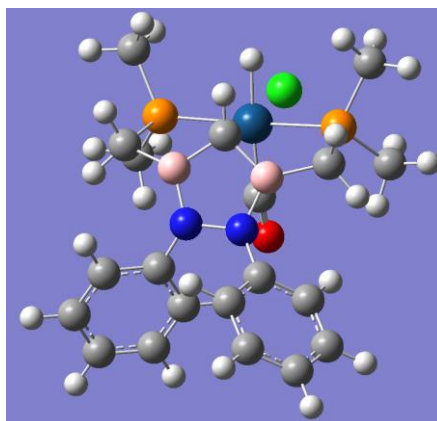

optimized structure of **7<sub>Me</sub>**

Ir-C bonding orbital

vacant p-orbitals of boron atoms

(top view)

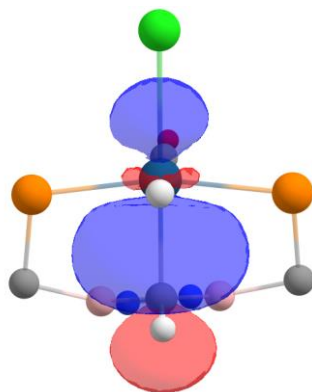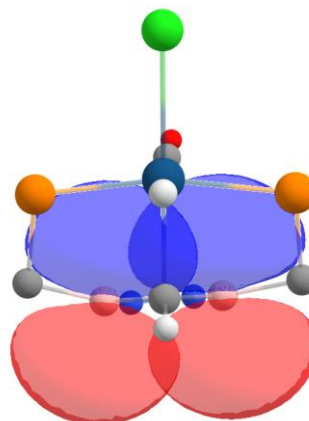

(side view)

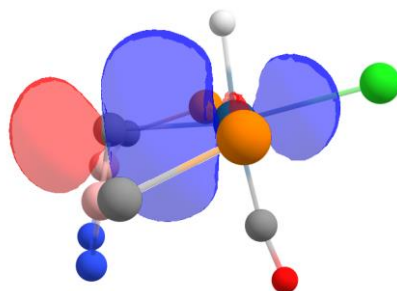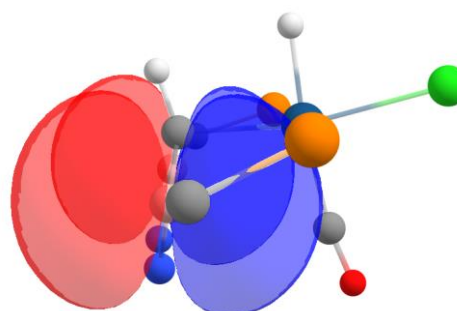

Total value of NBO second order perturbation from the Ir-C bonding orbital to the vacant p-orbitals of boron atoms was **344.77 kcal/mol**.

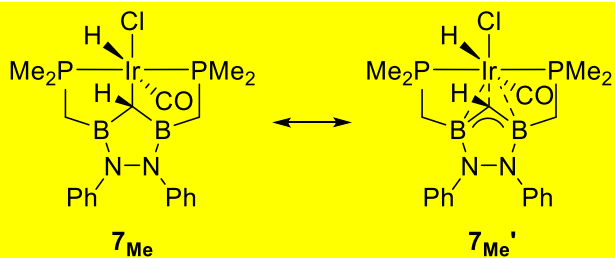

HOMO-4

LUMO

(front view)

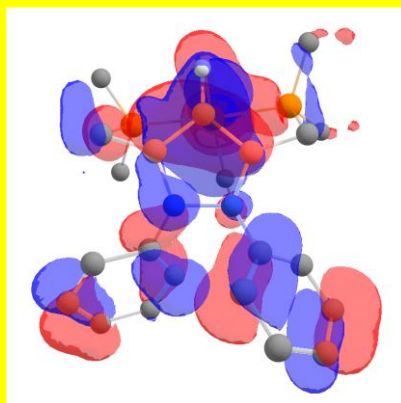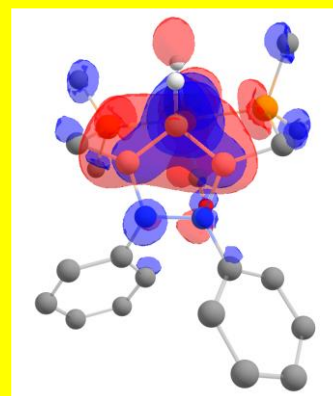

(side view)

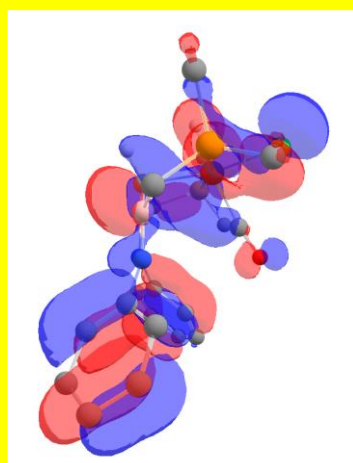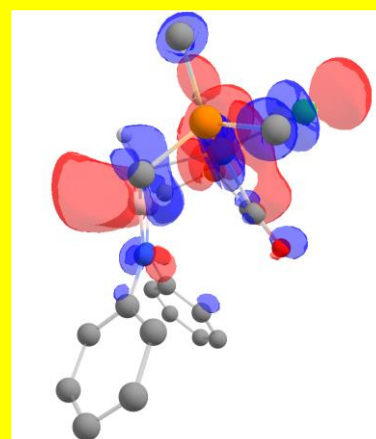

(top view)

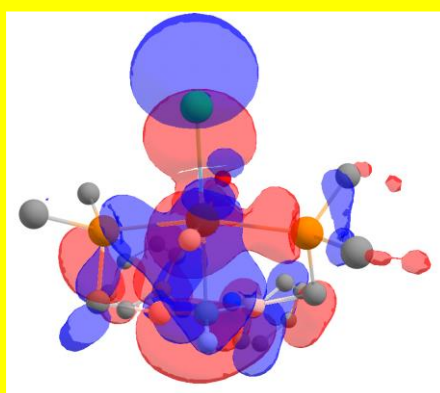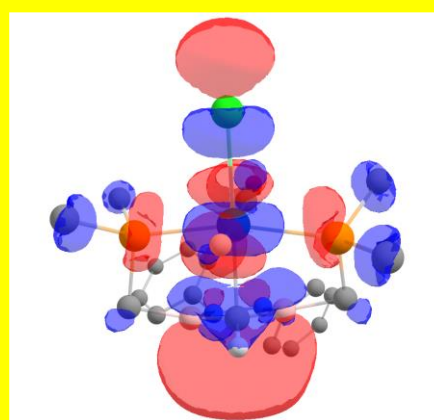

These two molecular orbitals support the contribution of  $7_{Me'}$  in which the ligand  $CB_2N_2$  ring takes  $\eta^3$ -type coordination mode with carbon and boron atoms.

## IV-II. Calculated Molecular Orbitals of Complexes **8<sub>Me</sub>** and **C<sub>Me</sub>**

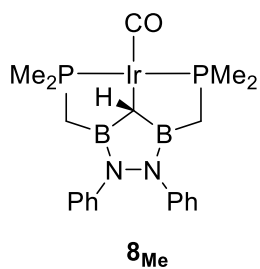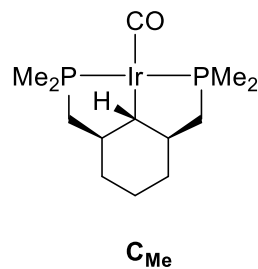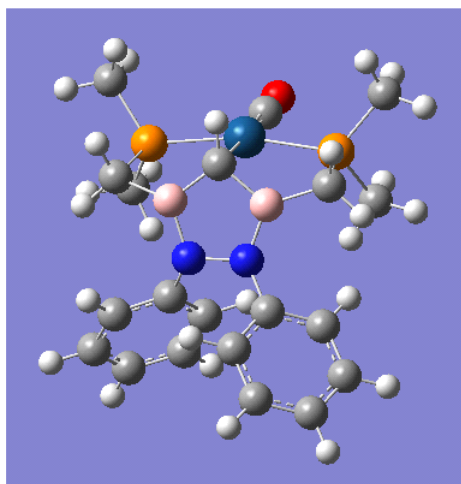

optimized structure of **8<sub>Me</sub>**

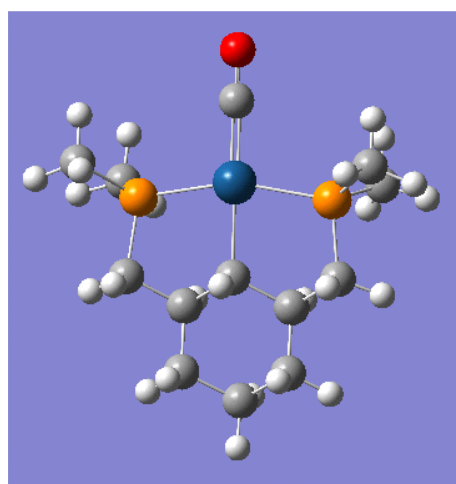

optimized structure of **C<sub>Me</sub>**

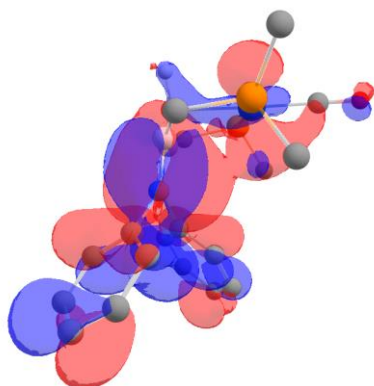

HOMO-1 of **8<sub>Me</sub>**

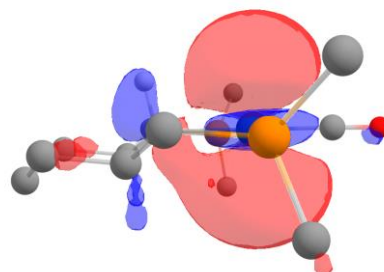

HOMO of **C<sub>Me</sub>**

In complex **8<sub>Me</sub>**, electrons in  $d_z^2$ -orbital of Ir are delocalized to vacant orbitals on boron atoms (left). On the other hand, in the case of **C<sub>Me</sub>**, the electrons almost localize on the metal centre and partly  $\alpha$ -carbon (right).

## IV-III. Deuterium Incorporation at the $\alpha$ -Position

The possible reaction pathways for the deuterium incorporation at the  $\alpha$ -carbon (Scheme 6 in the main text) were investigated by theoretical calculation with DFT (M06/Def2SVP,  $t$ Bu groups on the phosphorous atoms were simplified to be methyl groups,  $^1\text{H}$  was employed in place of  $^2\text{H}$ ). The calculated structures and their free energy relative to complex **10**<sub>Me</sub> are summarized in Scheme S4. It was found that the intermediacy of complex **14**<sub>Me</sub> generated after C–H(D) bond reductive elimination from **9**<sub>D'</sub><sub>Me</sub> is not feasible since we could not locate **14**<sub>Me</sub> as a stable intermediate on calculation, which is in contrast to the reported mechanisms proposed with analogous PC(sp<sup>3</sup>)P-Ir complexes.<sup>8</sup> Instead, there found a transition state (**TS(11**<sub>Me</sub>-**13**<sub>Me</sub>)) for hydrogen transfer from  $\alpha$ -carbon to hydride (or deuteride) in complex **11**<sub>Me</sub> which is the unstable isomer of **9**<sub>Me</sub> formed after oxidative addition of C–D bond to complex **10**<sub>Me</sub> (path A). The formation of phenyl diborylcarbene dihydrogen complex **13**<sub>Me</sub> would allow the experimentally observed deuterium incorporation at the  $\alpha$ -carbon with easy rotation of coordinating HD molecule. Another pathway (path B) is sigma-bond metathesis (**TS(12**<sub>Me</sub>-**13**<sub>Me</sub>)) of iridium-hydride bond in hydride diborylcarbene complex **12**<sub>Me</sub> and C–D bond in coordinated benzene. The formation of analogous iridium hydride carbene intermediates (corresponding to **12**<sub>Me</sub>) has been proposed in similar H/D exchange reactions with PCP-Ir complexes.<sup>8,9</sup> In the precedented studies, oxidative addition of C–D bonds to Ir(I) carbene complexes was reported to be quite facile thus enable the H/D exchange at  $\alpha$ -carbon. However, in our P<sub>B</sub>C<sub>B</sub>P system, the oxidative addition of C–D(C–H) bonds to **12**<sub>Me</sub> was disfavored as the resulting Ir(III) complex **15**<sub>Me</sub> could not be located as a stable intermediate in calculation and was seemingly too unstable to be considered. Thus as proposed in the main text (Scheme 6, path B), sigma-bond metathesis to afford phenyl carbene dihydrogen complex **13**<sub>Me</sub> is proposed as a more plausible mechanism. It should be noted that, although paths A and B are the most feasible mechanisms among we investigated, the calculated absolute energy barriers are higher than expected as the H/D exchange reaction proceeded at room temperature.

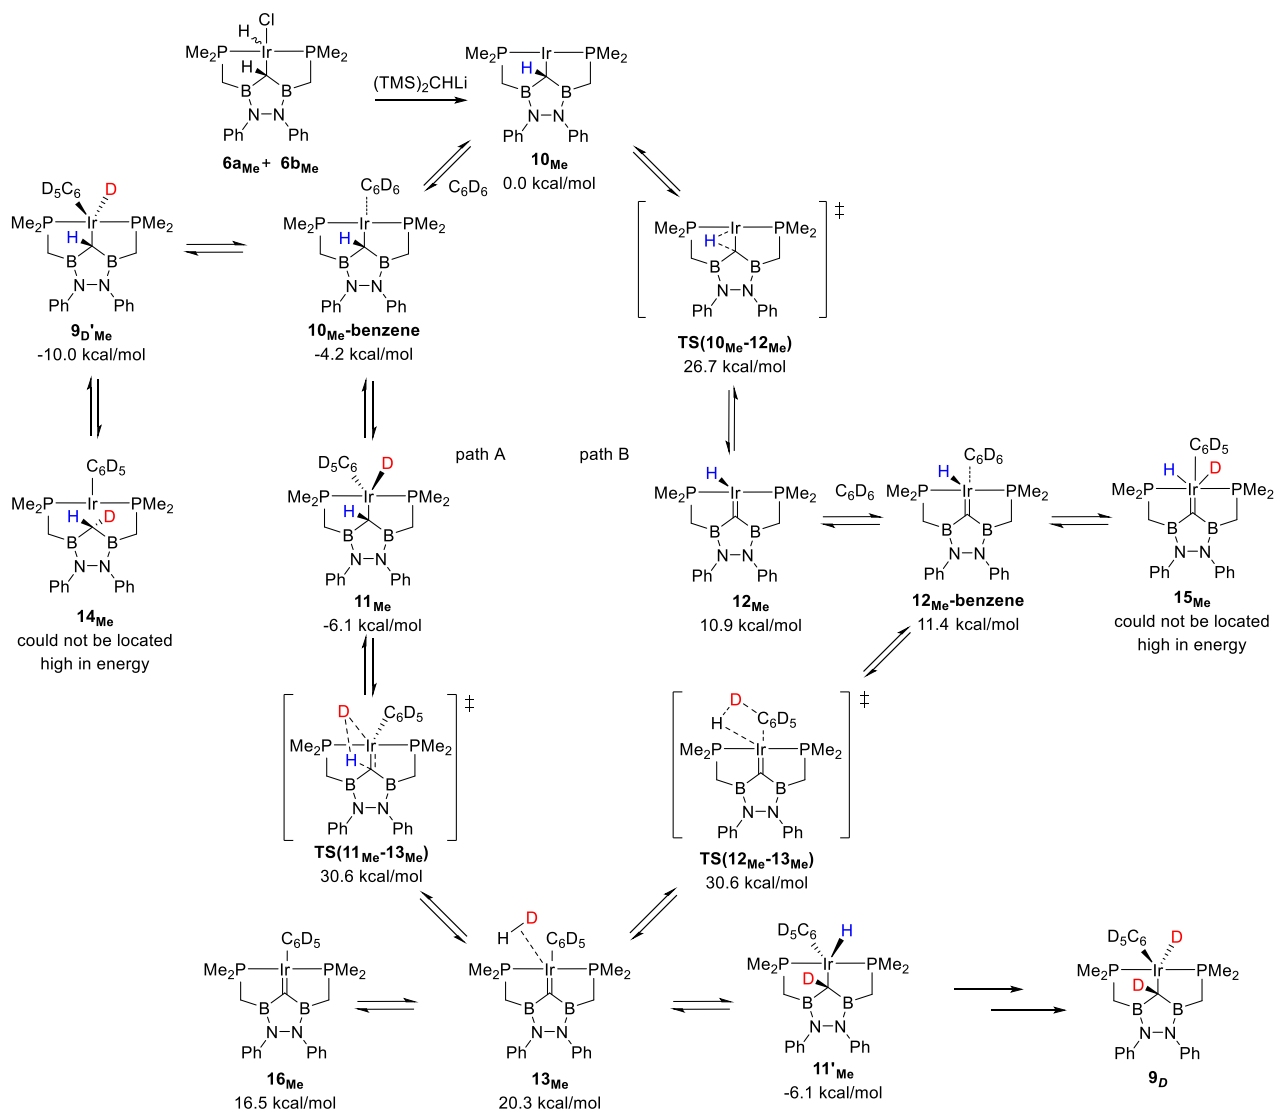

**Scheme S4.** Entire proposed pathways (M06/Def2SVP level of theory). <sup>t</sup>Bu groups were replaced with Me to simplify the calculation.

## V. References

- [1] A. B. Pangborn, M. A. Giardello, R. H. Grubbs, R. K. Rosen and F. J. Timmers, *Organometallics*, 1996, **15**, 1518–1520.
- [2] H. A. Ali, I. Goldberg and M. Srebnik, *Organometallics*, 2001, **20**, 3962–3965.
- [3] C. N. Iverson, R. J. Lachicotte, C. Müller and W. D. Jones, *Organometallics*, 2002, **21**, 5320–5333.
- [4] A. van der Ent, A. L. Onderdelinden and R. A. Schunn, *Inorg. Synth.*, 1990, **28**, 91.
- [5] E. Le Coz, Z. Zhang, T. Roisnel, L. Cavallo, L. Falivene, J.-F. Carpentier and Y. Sarazin, *Chem. Eur. J.*, 2020, **26**, 3535–3544.
- [6] M.J. Frisch, G.W. Trucks, H.B. Schlegel, G.E. Scuseria, M.A. Robb, J. R. C.; G. Scalmani, V. Barone, B. Mennucci, G.A. Petersson, H. Nakatsuji, M. C.; X. Li, H.P. Hratchian, A.F. Izmaylov, J. Bloino, G. Zheng, J.L. Sonnenberg, M.; Hada, M. Ehara, K. Toyota, R. Fukuda, J. Hasegawa, M. Ishida, T. Nakajima, Y.; Honda, O. Kitao, H. Nakai, T. Vreven, J.J.A. Montgomery, J.E. Peralta, F. O.; M. Bearpark, J.J. Heyd, E. Brothers, K.N. Kudin, V.N. Staroverov, T. Keith, R.; Kobayashi, J. Normand, K. Raghavachari, A. Rendell, J.C. Burant, S.S. Iyengar, J.; Tomasi, M. Cossi, N. Rega, J.M. Millam, M. Klene, J.E. Knox, J.B. Cross, V. B.; C. Adamo, J. Jaramillo, R. Gomperts, R.E. Stratmann, O. Yazyev, A.J. Austin, R.; Cammi, C. Pomelli, J.W. Ochterski, R.L. Martin, K. Morokuma, V. G. Z.; G.A. Voth, P. Salvador, J.J. Dannenberg, S. Dapprich, A.D. Daniels, O. Farkas, J. B.; Foresman, J.V. Ortiz, J. Cioslowski, D. J. F. Gaussian 09 Revision E.01. 2010.
- [7] Frisch, M. J.; Trucks, G. W.; Schlegel, H. B.; Scuseria, G. E.; Robb, M. A.; Cheeseman, J. R.; Scalmani, G.; Barone, V.; Petersson, G. A.; Nakatsuji, H.; Li, X.; Caricato, M.; Marenich, A. V.; Bloino, J.; Janesko, B. G.; Gomperts, R.; Mennucci, B.; Hratchian, H. P.; Ortiz, J. V.; Izmaylov, A. F.; Sonnenberg, J. L.; Williams-Young, D.; Ding, F.; Lipparini, F.; Egidi, F.; Goings, J.; Peng, B.; Petrone, A.; Henderson, T.; Ranasinghe, D.; Zakrzewski, V. G.; Gao, J.; Rega, N.; Zheng, G.; Liang, W.; Hada, M.; Ehara, M.; Toyota, K.; Fukuda, R.; Hasegawa, J.; Ishida, M.; Nakajima, T.; Honda, Y.; Kitao, O.; Nakai, H.; Vreven, T.; Throssell, K.; Montgomery, Jr. J. A.; Peralta, J. E.; Ogliaro, F.; Bearpark, M. J.; Heyd, J. J.; Brothers, E. N.; Kudin, K. N.; Staroverov, V. N.; Keith, T. A.; Kobayashi, R.; Normand, J.; Raghavachari, K.; Rendell, A. P.; Burant, J. C.; Iyengar, S. S.; Tomasi, J.; Cossi, M.; Millam, J. M.; Klene, M.; Adamo, C.; Cammi, R.; Ochterski, J. W.; Martin, R. L.; Morokuma, K.; Farkas, O.; Foresman, J. B.; Fox, D. J. Gaussian 16, Revision C.01, Gaussian, Inc., Wallingford CT, 2016.
- [8] (a) J. Zhou and J. F. Hartwig, *Angew. Chem., Int. Ed.*, 2008, **47**, 5783–5787; (b) A. V. Polukeev, R. Marcos, M. S. G. Ahlquist and O. F. Wendt, *Organometallics*, 2016, **35**, 2600–2608.
- [9] J. D. Smith, G. Durrant, D. H. Ess, B. S. Gelfand, W. E. Piers, *Chem. Sci.* 2020, **11**, 10705–10717.
